# Supplementary material for: Dynamics of cognitive variability with age and its genetic underpinning in NIHR BioResource Genes and Cognition cohort participants
Source: PubMed Central journal article supplement (PMC11186791; doi:10.1038/s41591-024-02960-5), 2024-05-14
Supplement: 41591_2024_2960_MOESM1_ESM.pdf [file 41591_2024_2960_MOESM1_ESM.pdf]

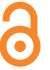

---

# **Dynamics of cognitive variability with age and its genetic underpinning in NIHR BioResource Genes and Cognition cohort participants**

---

In the format provided by the authors and unedited

## Contents

|                            |    |
|----------------------------|----|
| Supplementary Note.....    | 2  |
| Supplementary Figures..... | 5  |
| Supplementary Tables ..... | 14 |
| Reference.....             | 46 |

## Supplementary Note

**RT.** The test involved 60 questions, which required participants to select the correct pane (left-and right) based on the stimulation provided. The time taken for each question was recorded in milliseconds. This test measures overall alertness and motor speed. The mean reaction time was used as the primary outcome of the test. Prior to analysis, RT scores underwent a log<sub>10</sub> transformation.

**SB.** Each of the participants was shown a box coloured in red, blue, black, or white. Below the box, two names (in black text) were given, one of which described the box colour shown above. Below the names, participants were shown two arrows within the box (left and right) to choose the right colour corresponding to the box. There were 30 questions, each requiring participants to select the right colour displayed in the box as fast and accurately as possible. The test had a pale background and red color was brightened to red orange (a shade that falls between red and orange) to accommodate color blindness, where participants perceive red as dark and mix up red and blue colors. No feedback regarding the correct or incorrect responses was provided. The primary outcome of this test was the average response time, which underwent a log<sub>10</sub> transformation. This test was designed to measure processing speed and attention.

**SI.** Each of the participants was shown a written word describing a color. The word itself was colored in red, blue, black, or white. Below the colored written word, two color names (in black) were provided, one of which correctly described the color of the written word presented above. Below the black-inked color names, the participant was shown two arrows in the box (left and right) to choose the right color indicated above. There were 30 questions requiring the participant to select the right color as fast and accurately as possible. No feedback regarding the correct or incorrect responses was provided. The primary outcome of this test was the average response time, which was log<sub>10</sub> transformed. This test was designed to measure processing speed and attention. The test was also designed to accommodate color blindness.

**SD.** This is also known as symbol digit substitution test. In the test, participants were shown symbols paired with numbers in the top row. Below, in the test row, all of the symbols from the top row were presented in an unorganised manner. Participants were instructed to enter the number that belongs to each symbol as shown in the top row, using the keypad on the screen. Rows were selected at random from the 33 code strings available. The test updated the test row when the participant had completed entering digits for the test row (all 8 codes) and would move onto the next row in the array until the timer of 60 seconds had expired. The test allowed participants to finish their current test row if the timer had expired but did not record any responses after the timeout. The outcome of this test was the total number of correct symbol-digit matches made. Prior to the analysis, we reversed the test scores by subtracting the number of correct matches from the observed maximum number of correct matches seen in the population. This test assesses psychomotor speed.

**TMN and TMA.** The trail making test consisted of two parts: (i) TMN and (ii) TMA. In the TMN task, participants were shown numbers 1-25 pseudo randomly on the screen and instructed to touch them in numeric order as quickly and accurately as possible. In the TMA task, participants were shown numbers 1-13 and letters A-L together pseudo randomly on the screen and instructed to touch first the number and then letter in numeric and alphabetical order (i.e., 1-A-2-B-3-C) as quickly and accurately as possible. The main outcome for both parts of the tests was mean response time in milliseconds to sequentially identify the correct element of the sequence, which was log<sub>10</sub> transformed. Both tests assess executive functioning. In the analysis, we considered both parts of the test separately.

**MX.** Participants were shown a 3x3 matrix of tiles with one missing piece and provided with eight options at the bottom of the screen to select the missing tile that completed the 3x3 matrix displayed on top. There were 15 questions of this nature, each of which was timed for 60 seconds. If the time for a question expired, the app automatically progressed to the next question and considered the expired question incorrect. The primary outcome of this test was the total number of correct answers made, which was reversed prior to the analysis by using the total number of incorrect answers. This test measures non-verbal fluid intelligence.

**WM.** This test involved a number shown to participants for memorization, and a proportionate amount of time was given for memorization and recall depending on the length of the number (number of digits). Correct recall of the number resulted in the number string expanding in length (by one digit). All numeric strings of numbers were randomly generated with an algorithm that prevents repeated numbers. Before starting the test, the participants were allowed to have unlimited attempts to practice with single- and double-digit length numbers. The test ended either when the participant made two incorrect recalls of number string consecutively or when the participant reached the end of the test (a 24-digit length string). The primary outcome of this test was the total number of correct responses made by participants, transformed with log<sub>10</sub> and reverse-scored in the similar way to SD prior to analysis. The WM test is also known as the numeric memory test.

**QZ.** This test comprised of 13 questions, which required participants to choose the correct answer from multiple choices (5 options, with one exception having 4 options). The test had a fixed duration of 2 minutes. After that, participants were not allowed to complete the rest of the test. The time taken to answer each question was recorded in milliseconds. The primary outcome of this test was the total number of correct responses made within 2 minutes. Prior to the analysis, test scores were reversed by using the total number of incorrect answers. This test is also recognized as a measure of fluid intelligence, which measures verbal and numerical reasoning abilities.

**VY.** This test involved answering 20 questions (stimuli provided in [Supplementary Table 28](#)). For each question, a word was shown on the left side of the screen and participants were provided with 6 words on the right side of the screen to choose the correct synonym. The time limit for each question was 21 seconds.

The primary outcome of this test was the total number of correct answers made, which was reversed by using the total number of incorrect answers. This test assesses crystallized intelligence.

**PR.** This test involved participants recalling the positions of different shapes. First, participants were presented with 7 different shapes in 7 different locations, one after another. Once all shapes were displayed, one of the shapes was shown in the middle of the screen and participants were invited to identify its correct location based on its previous appearance. The primary measure for this test was the total number of guesses required to complete the task which underwent a log10 transformation. This test is designed to measure episodic memory and attention.

**G4 and G6.** Initially, we performed PC analysis using all cognitive test scores. Eigenvalues depicted on the scree plot indicated three PCs where 6 tests (RT, TMN, TMA, SB, SI and SD) fall onto the 1<sup>st</sup> PC (explaining 41.3% variance), 4 tests (WM, MX, QZ and VY) fall onto the 2<sup>nd</sup> PC (explaining 15.6% of the variance) and PR falls onto the 3<sup>rd</sup> PC. Based on the initial observations, we decided to create two measures of general cognitive ability. We used scores of RT, TMN, TMA, SB, SI and SD tests to create PCs. Scores on the first rotated PC, which accounted for 66.5% of the total variance ([Extended Data Fig 3A and C](#)), were used as a measure of general cognitive ability (we named it *G6*). The expected contribution of TMN, TMA and RT to *G6* was lower than SB, SI and SD ([Extended Data Fig 3B](#)). Likewise, we used WM, MX, QZ and VY to create PCs and the first rotated PC, which accounted for 46.6% of the total variance ([Extended Data Fig 4A and C](#)), were used as the 2<sup>nd</sup> measure of general cognitive ability (we named it *G4*). The expected contribution of MX and WM to *G4* was lower ([Extended Data Fig 4B](#)). We used the “prcomp” function from *the stats* package in *R* for PCA analysis. Note, PR was not included in the calculation of general cognitive ability.

# Supplementary Figures

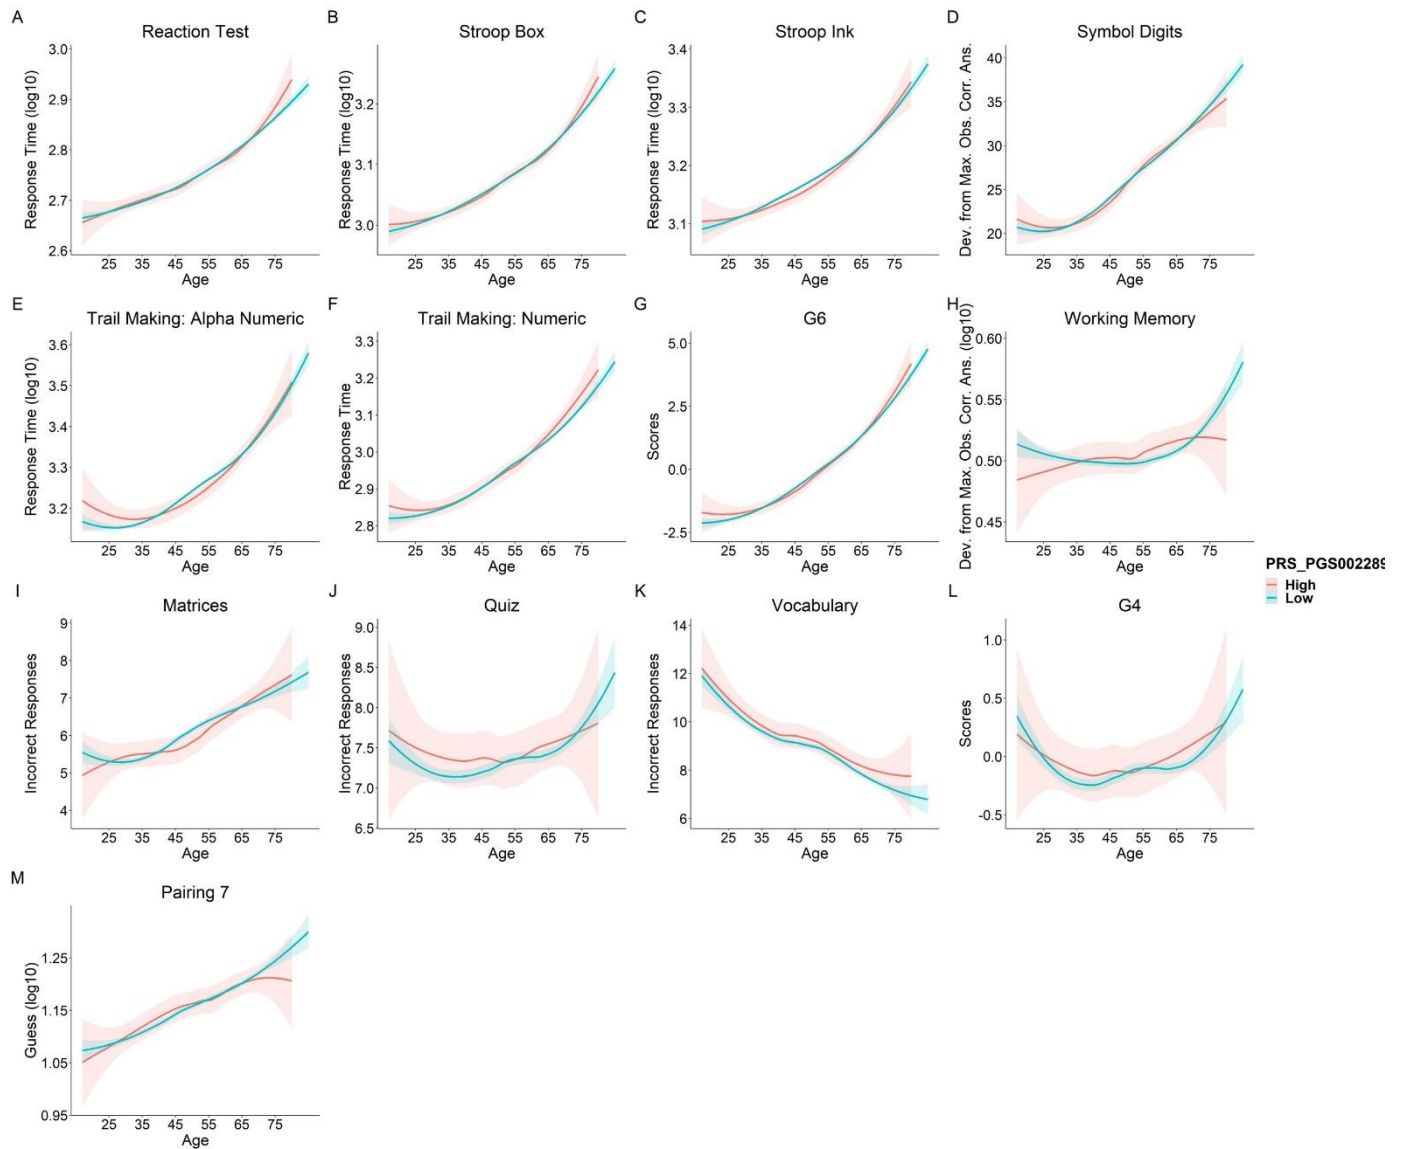

**Supplementary Fig. 1 | 11 Cognitive tests and two measures of general cognitive ability (G4 and G6) stratified by Alzheimer's disease polygenic risk score (AD-PRS) groups (derived from the polygenic catalogue ID: PGS002289, excluded APOE region). The x-axis represents the age, and the y-axis represents scores for the corresponding test (A-K) or measures of general cognitive ability (L-M). Red and blue lines across the plots represent lines of best fit with standard error for AD risk groups (High and Low), specified on the right side of the plot with a color-coded legend. Response Time is the average time taken per item.**

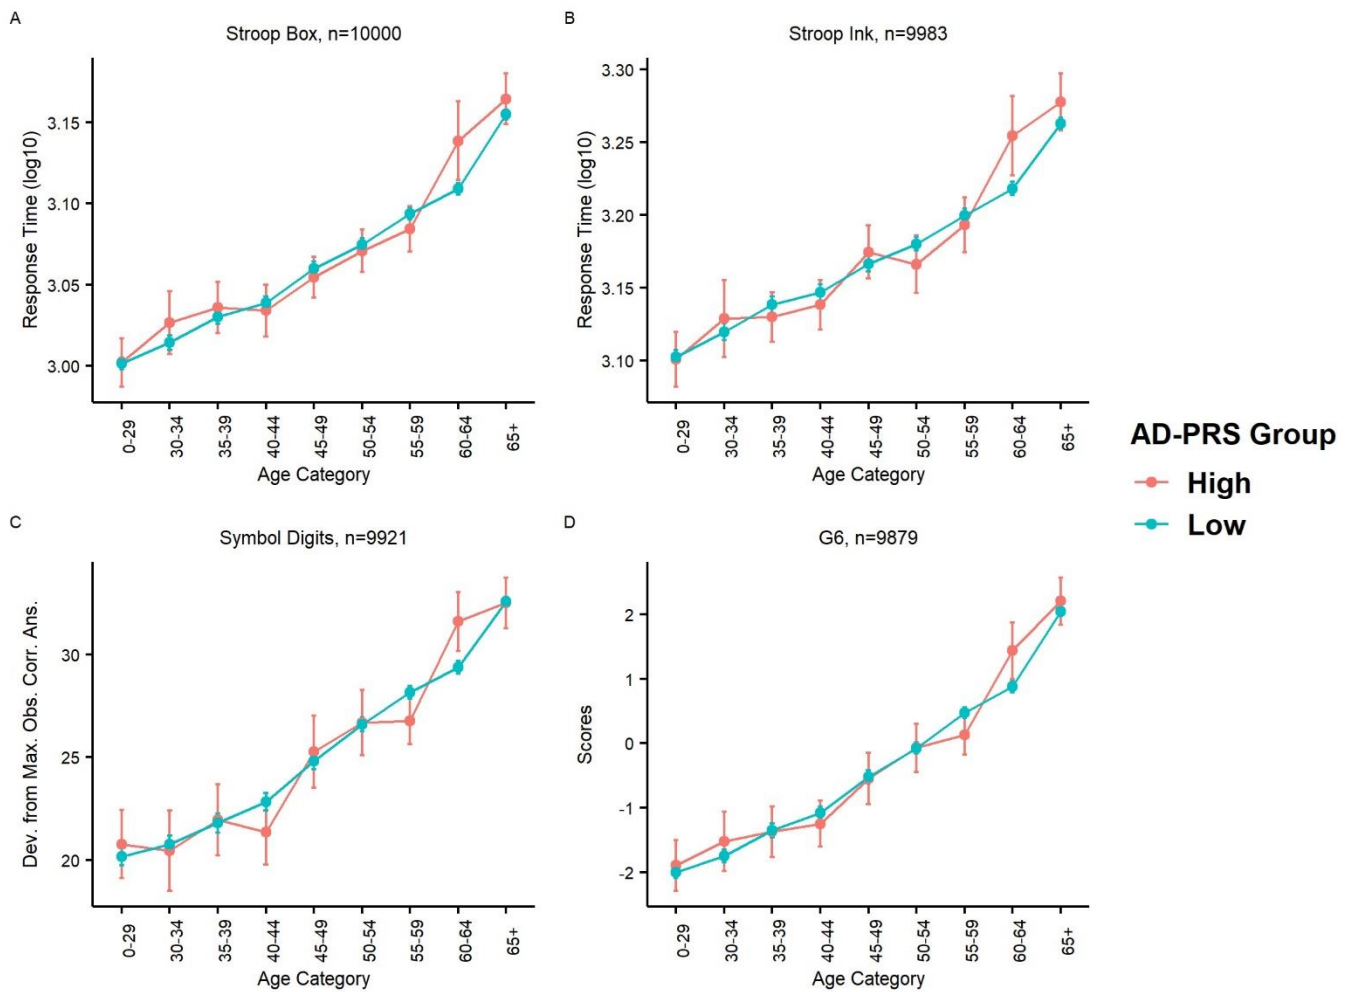

**Supplementary Fig. 2 | Mean cognitive phenotype scores across age categories stratified by Alzheimer’s disease polygenic risk score (AD-PRS) group (derived from the polygenic score catalogue ID: PGS002289, included APOE region).** (A) Stroop box, (B) Stroop Ink, (C) Symbol Digits and (D) G6. (A-D) In each of the plots, mean score differences between AD-PRS groups across different age groups were assessed using t-tests. The x-axis represents age categories and y-axis indicate scores for the corresponding cognitive phenotype. Bars are aligned based on age category and indicates 95% confidence interval for mean. Red and blue lines across plots represent AD risk groups (High and Low), specified in the right side of the plot with colour coded legend. Response Time is the average time taken per item.

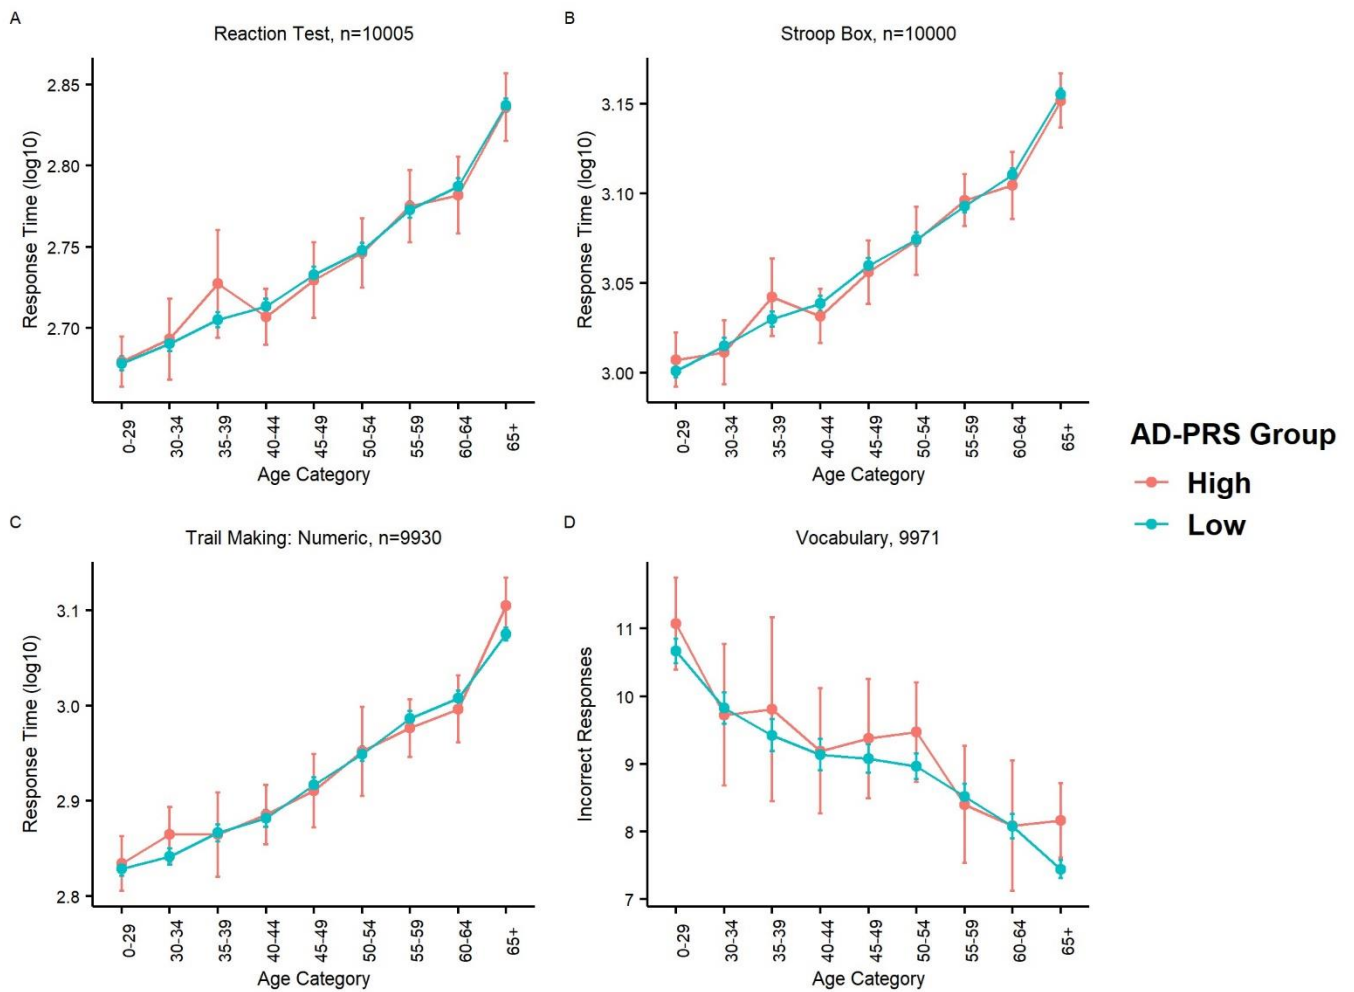

**Supplementary Fig. 3 | Mean cognitive phenotype scores across age categories stratified by Alzheimer’s disease polygenic risk score (AD-PRS) group (derived from the polygenic score catalogue ID: PGS002289, excluded APOE region).** (A) Reaction test, (B) Stroop Box, (C) Trail Making: Numeric and (D) Vocabulary. (A-D) In each of the plots, mean score differences between AD-PRS groups across different age groups were assessed using t-tests. The x-axis represents age categories and y-axis indicate scores for the corresponding cognitive phenotype. Bars are aligned based on age category and indicates 95% confidence interval for mean. Red and blue lines across plots represent AD risk groups (High and Low), specified in the right side of the plot with colour coded legend. Response Time is the average time taken per item.



A

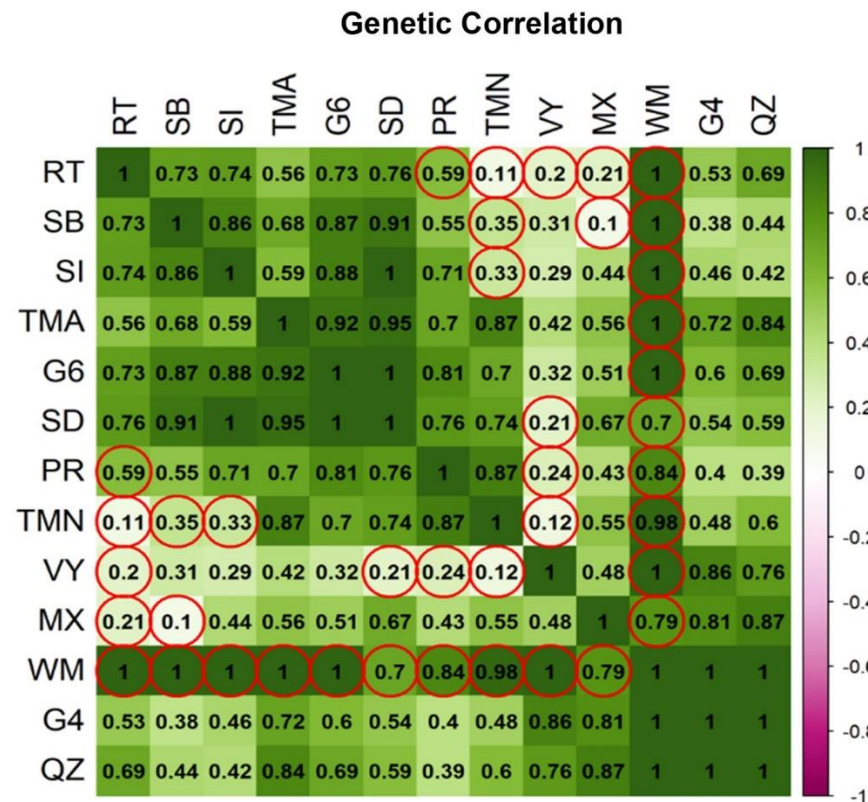

B

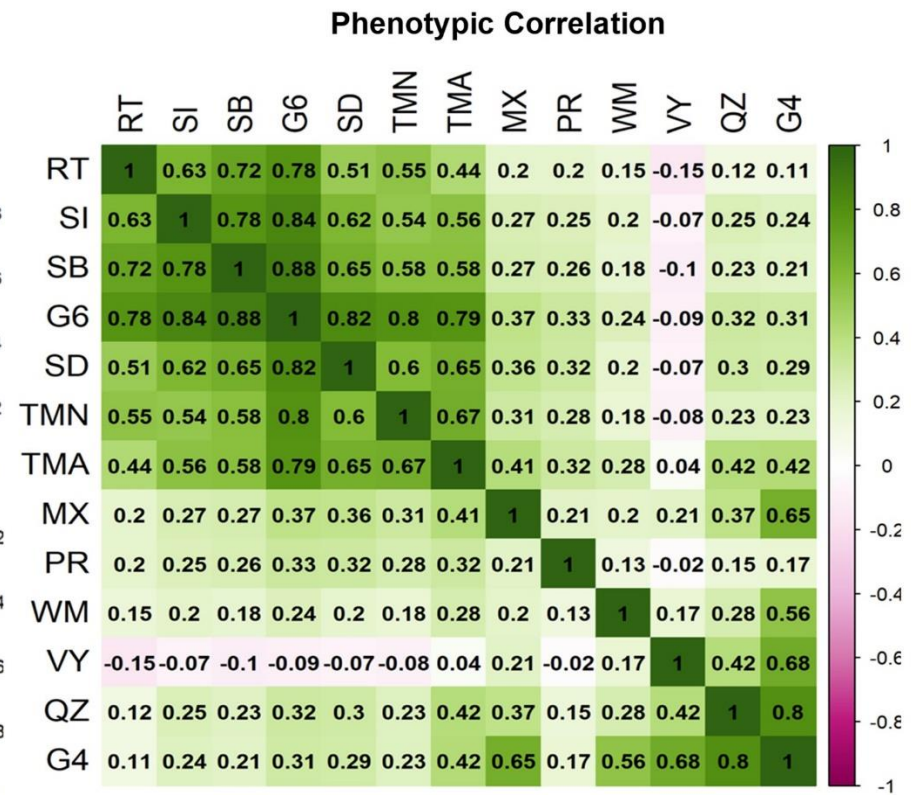

**Supplementary Fig. 4 | (A) Heatmap of genetic correlation for 11 cognitive tests and two measures of general cognitive ability (G4 and G6).** Cells highlighted in red circle indicate non-significant correlation (two-tailed  $p > 0.05$ ), and **(B) Heatmap of phenotypic correlation for 11 cognitive tests and two measures of general cognitive ability (G4 and G6).** (A-B) QZ: Quiz; WM: Working memory; MX: Matrices; SD: Symbols Digit; VY: Vocabulary; RT: Reaction Test; PR: Pairing 7; SB: Stroop Box; SI: Stroop Ink; TMN: Trail Making Numeric; TMA: Trail Making Alpha Numeric. Phenotypic and genetic correlation analyses was confined to participants for whom genetic data was available and completed all cognitive tests. In both plots, each coloured cell indicates magnitudes of correlations. Each coloured cell indicates magnitudes of correlations. The corresponding colour scale is presented on the right side of the heatmap where dark green represents the highest correlation, and darker moderate pink represents highest negative correlation. On the x- and y-axis, all cognitive phenotypes are presented maintaining the order.

A

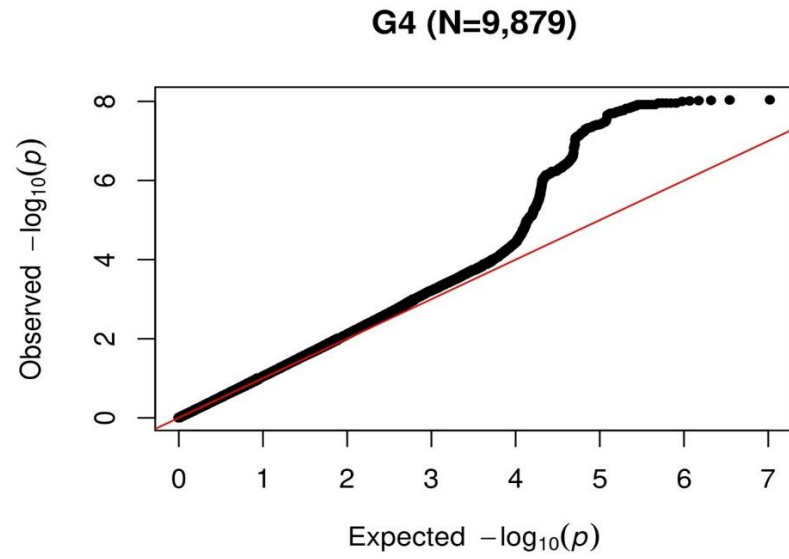

B

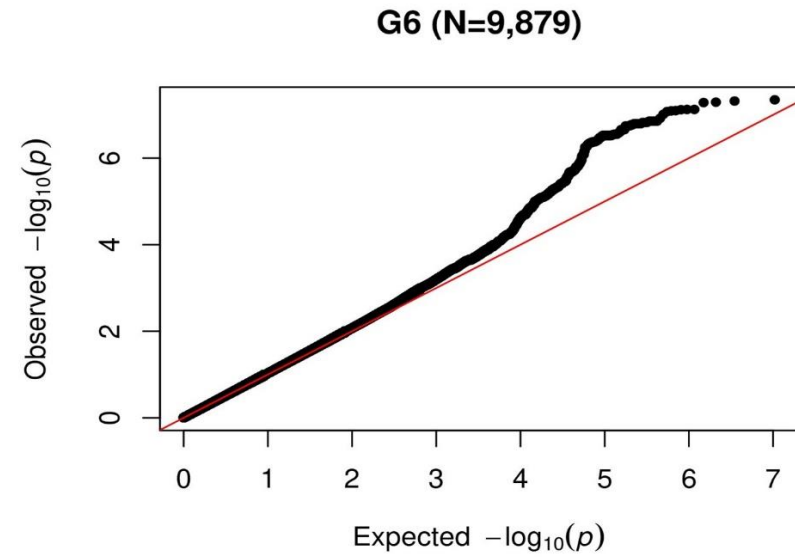

**Supplementary Fig. 5** | The QQ plot of GWAS summary statistics of G4 (**A**) and G6 (**B**). (**A-B**) The x-axis shows the expected  $-\log_{10}$  transformed p-values and the y-axis shows the observed  $-\log_{10}$  transformed p-values from the two-sided BOLT infinitesimal model.

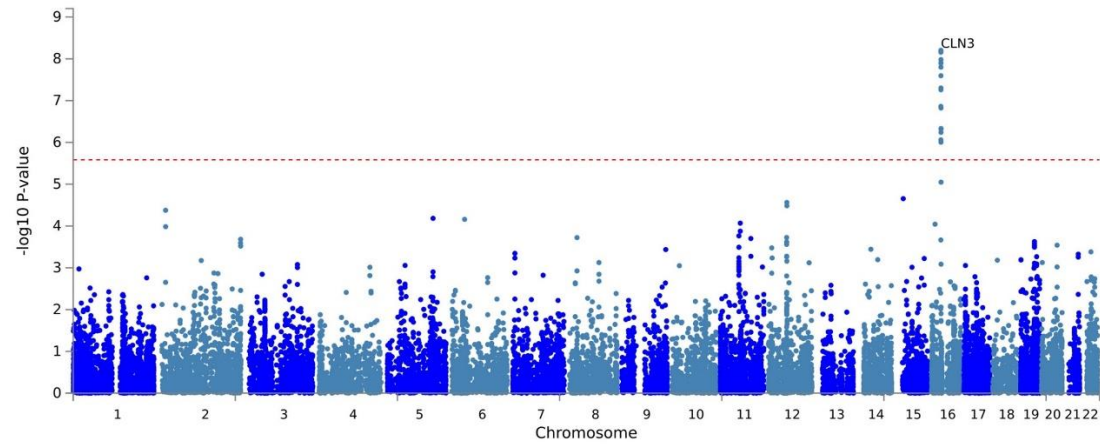

**Supplementary Fig. 6 | Manhattan plot for the genome-wide gene-based association analysis of G4.** The y-axis shows the  $-\log_{10}$  transformed two-tailed p-value of each gene from a linear model and the chromosomal position on the x-axis. The red dotted line indicates the Bonferroni-corrected threshold for the genome-wide significance of the gene-based test. The gene with the lowest p-value was highlighted.

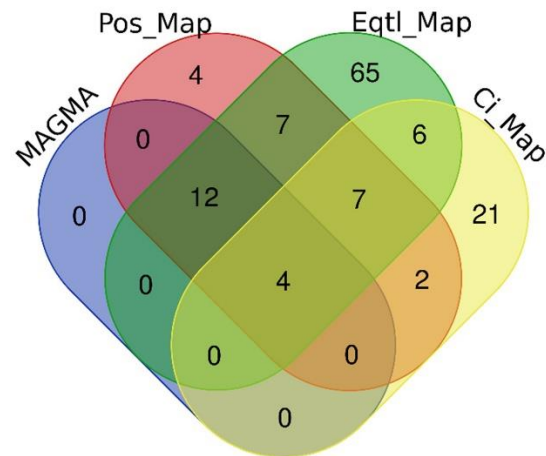

**Supplementary Fig. 7 | Venn diagram showing overlap of prioritised genes for G4 implicated by genome wide gene-based analysis (implemented in MAGMA), positional mapping (Pos\_Map), chromatin interaction mapping (Ci\_Map), and expression quantitative trait locus mapping (Eqtl\_Map).**

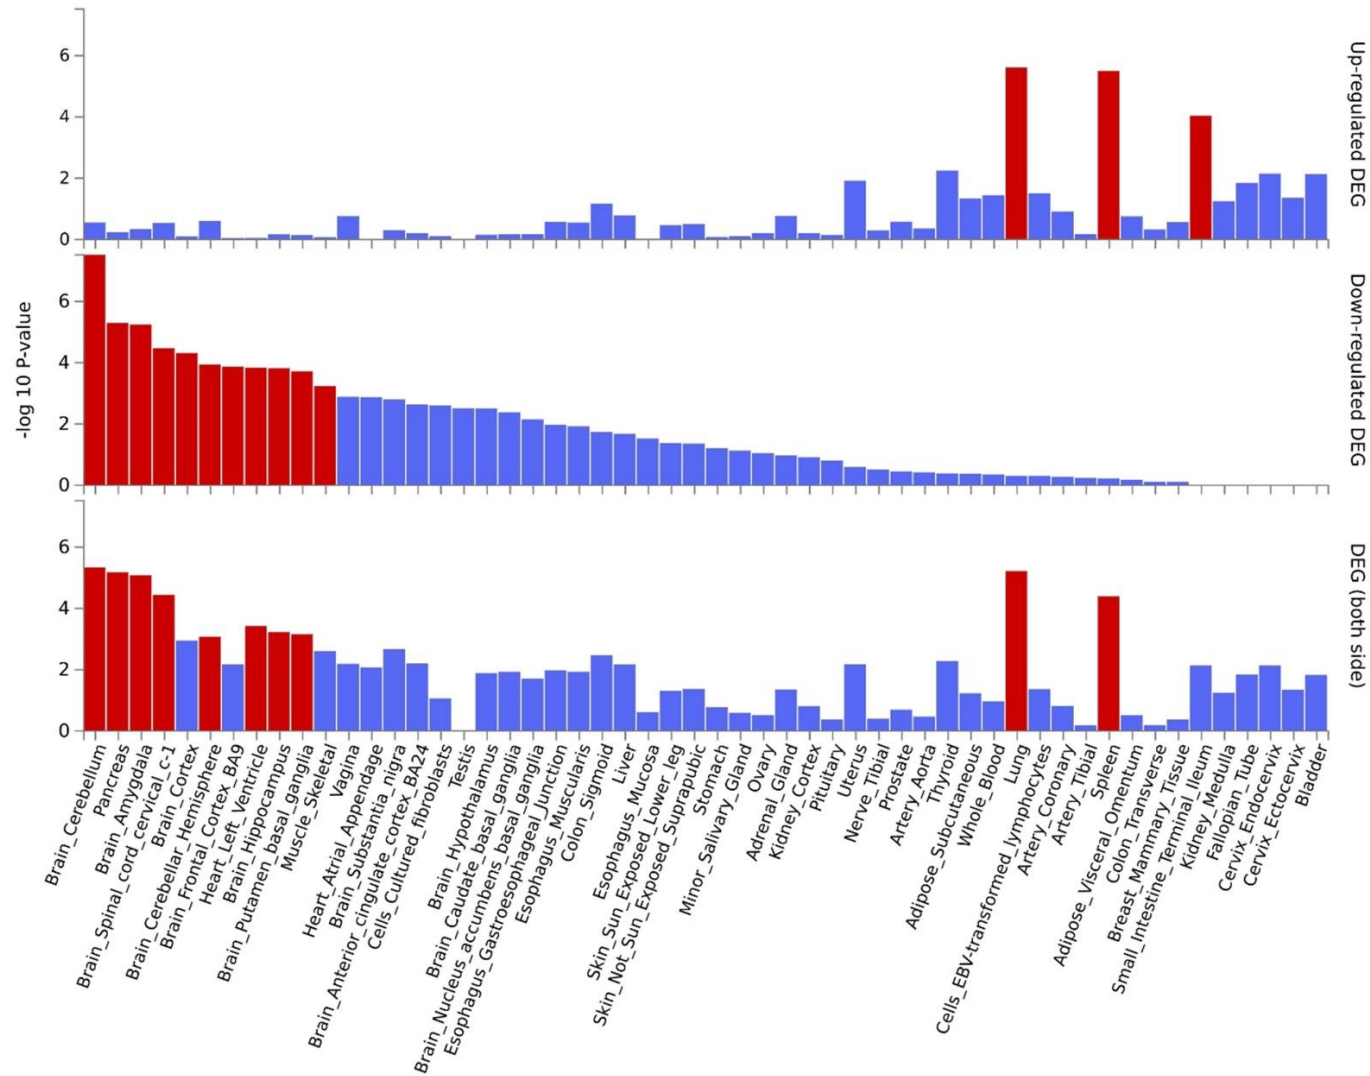

**Supplementary Fig. 8 | Differentially expressed gene (DEG) plots for G4 in 54 tissue types from GTEx v8.** The x-axis represents the GTEx (v8) tissues, and the y-axis represents the  $-\log_{10}$  transformed two-tailed p-value of the hypergeometric test. Significantly enriched DEG sets (Bonferroni-corrected p value  $< 0.05$ ) are highlighted in red.

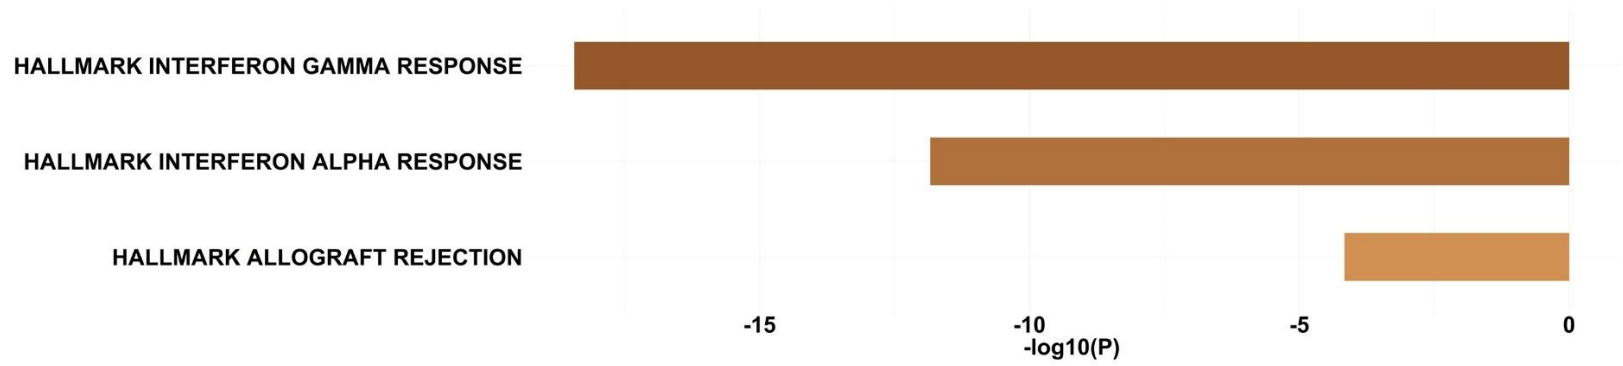

**Supplementary Fig. 9 | Enrichment for hallmark gene-sets for G4.** Two-tailed p-values ( $-\log_{10}$  transformed) are computed using the cumulative hypergeometric distribution.

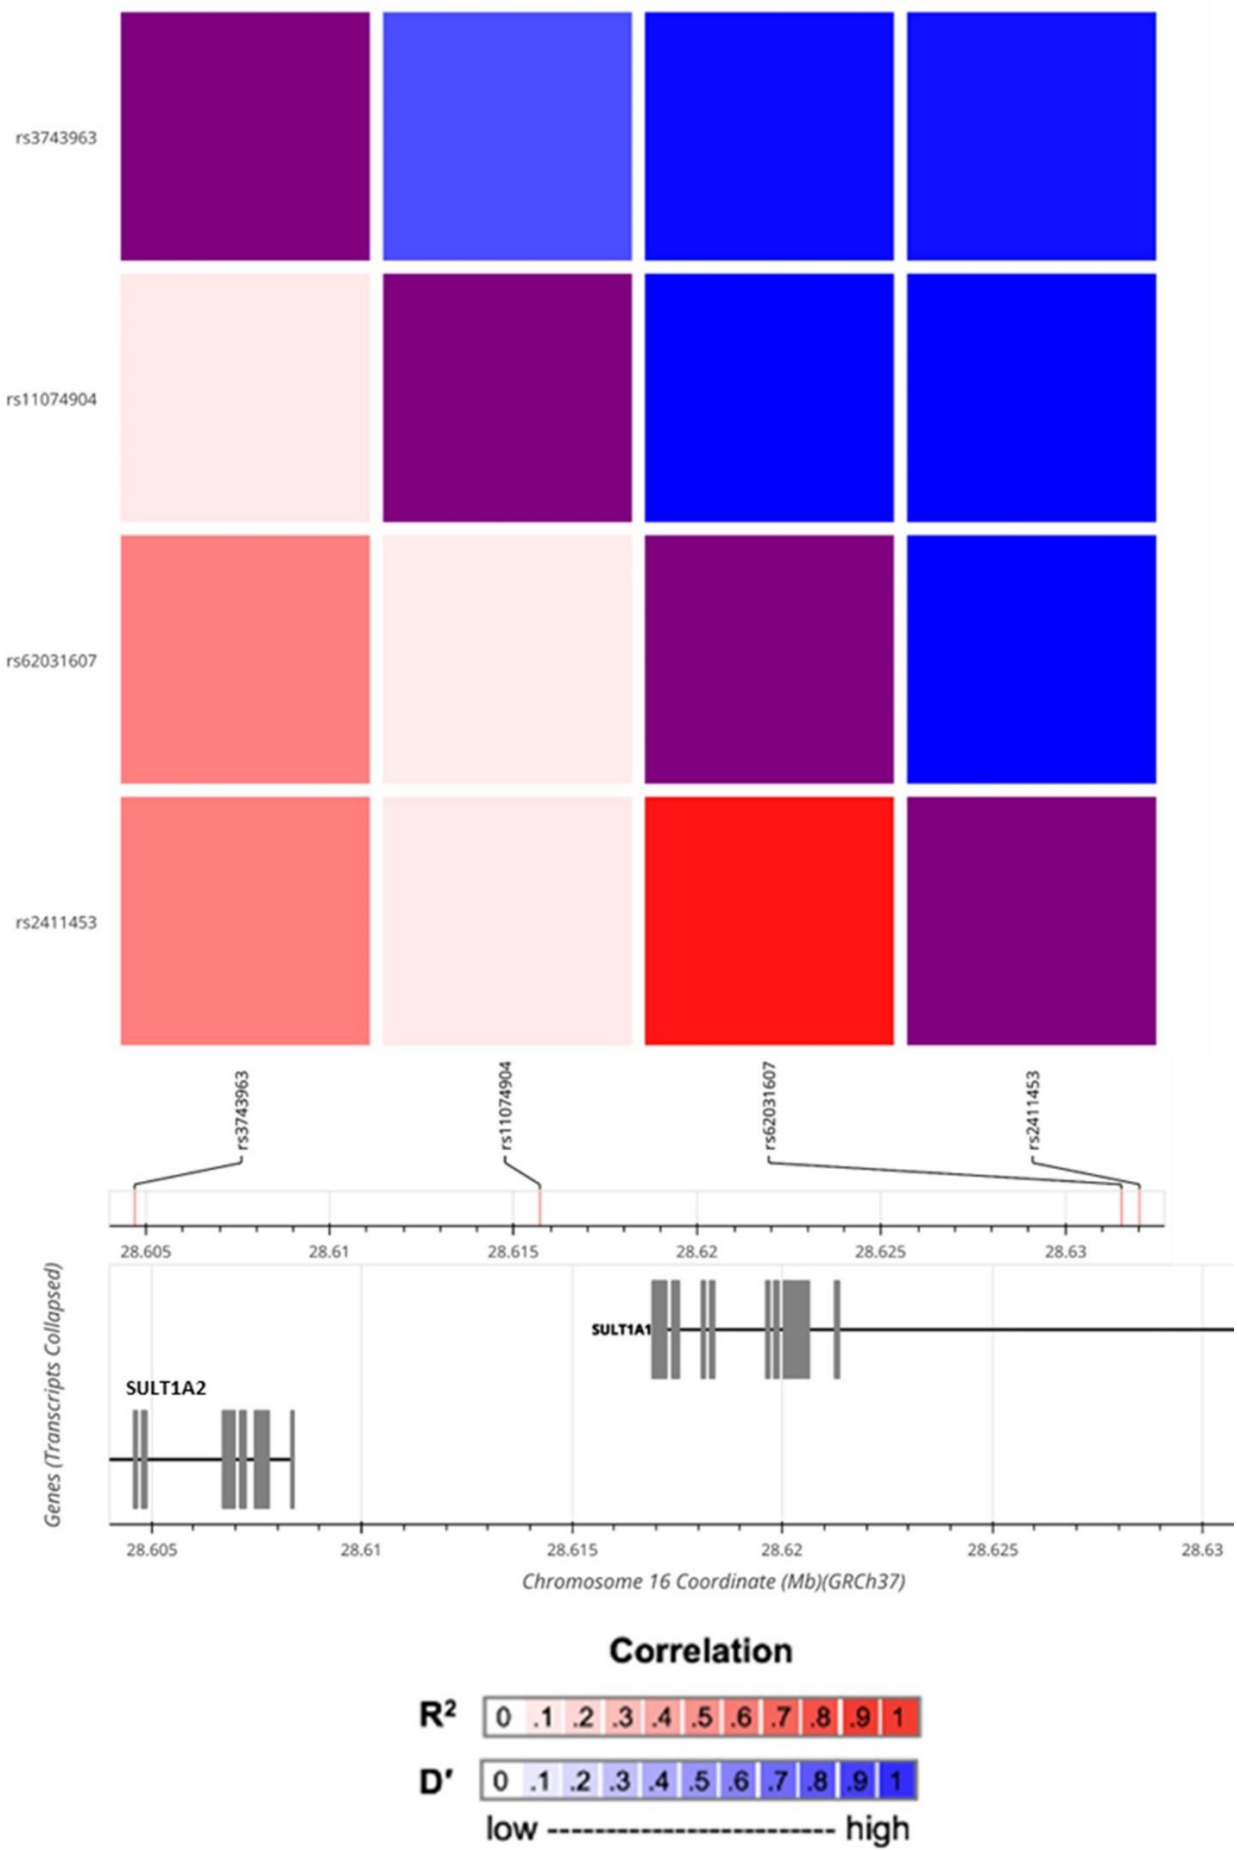

**Supplementary Fig. 10 | Fine mapped SNPs for G4 and their intercorrelation.** The strength of correlation is presented at the bottom of the plot. This plot was created using the LDmatrix tool (<https://ldlink.nih.gov/?tab=ldmatrix>)<sup>95</sup>.

## Supplementary Tables

**Supplementary Table 1** | Self-reported clinical information available on G&C study participants.

| Diagnosis <sup>1</sup>                       | N=21,051   |
|----------------------------------------------|------------|
| Colour Blindness, yes; n (%)                 | 605 (2.9)  |
| Learning Disability, yes; n (%)              | 720 (3.5)  |
| Brain Surgery (affect day to day life), n    | 1          |
| Charcot-Marie-Tooth, n                       | 1          |
| Mild Cognitive Impairment, n                 | 1          |
| Memory Issue, n                              | 1          |
| Myopic Maculopathy, n                        | 1          |
| Osteoarthritis (thumbs and wrist), n         | 1          |
| Arthritis, yes; n (%)                        | 1155 (5.5) |
| Diabetes, yes; n (%)                         | 561 (2.7)  |
| Heart Conditions, yes; n (%)                 | 368 (1.7)  |
| High Blood Pressure, yes; n (%)              | 1844 (8.8) |
| Mental Health Disorders, yes; n (%)          | 192 (0.9)  |
| Stroke and Associated Conditions, yes; n (%) | 110 (0.5)  |
| ADHD or Autism, yes; n (%)                   | 7 (0.0)    |

<sup>1</sup> All diagnoses were self-reported in response to questionnaire provided either by NIHR BioResource or Cognitive Test application.

**Supplementary Table 2** | Types of transformation performed to cognitive test scores, what domain of cognition these tests cover and what the score means.

| Tests                             | Transformation | Intelligence Type/Domain                             | Scores Meaning           |
|-----------------------------------|----------------|------------------------------------------------------|--------------------------|
| Reaction Test (RT)                | Log10          | Reaction time                                        |                          |
| Stroop Box (SB)                   | Log10          | Attention, processing speed                          |                          |
| Stroop Ink (SI)                   | Log10          | Attention, processing speed                          |                          |
| Trail Making: Numeric (TMN)       | Log10          | Executive functioning                                | A higher                 |
| Trail Making: Alpha Numeric (TMA) | Log10          | Executive functioning                                | score means              |
| Symbols Digit (SD)                | None           | Psychomotor speed (processing speed)                 | poorer                   |
| Matrices (MX)                     | None           | Non-verbal reasoning (non-verbal fluid intelligence) | performance <sup>1</sup> |
| Working memory (WM)               | Log10          | Short term memory, attention, executive function     |                          |
| Quiz (QZ)                         | None           | Fluid intelligence (verbal and numeric reasoning)    |                          |
| Vocabulary (VY)                   | None           | Vocabulary level (Crystallized intelligence)         |                          |
| Pairing 7 (PR)                    | Log10          | Visual episodic memory                               |                          |

<sup>1</sup> *SD, MX, WM, QZ, and VY* scores were reversed (following the transformation for WM) using formula: max (test score)-tests score to have same direction of interpretation as other tests.

**Supplementary Table 3** | Median and mean values for different cognitive test scores for all participants and for those whose genetic data were available.

| Tests <sup>1</sup> | All samples (N=20,928) |                            |                            | Genetic data Available (N=10,038) |                            |                            |
|--------------------|------------------------|----------------------------|----------------------------|-----------------------------------|----------------------------|----------------------------|
|                    | Max-Min                | Median [IQR <sup>1</sup> ] | Mean (S.Dev <sup>1</sup> ) | Max-Min                           | Median [IQR <sup>1</sup> ] | Mean (S.Dev <sup>1</sup> ) |
| RT                 | 3.56-2.40              | 2.73 [2.69, 2.80]          | 2.75 (0.10)                | 3.56-2.40                         | 2.74 [2.69, 2.81]          | 2.76 (0.10)                |
| SB                 | 3.57-2.83              | 3.07 [3.02, 3.13]          | 3.08 (0.08)                | 3.57-2.85                         | 3.07 [3.02, 3.13]          | 3.08 (0.08)                |
| SI                 | 3.75-2.83              | 3.18 [3.12, 3.24]          | 3.18 (0.10)                | 3.75-2.83                         | 3.18 [3.12, 3.25]          | 3.19 (0.10)                |
| SD                 | 54-0                   | 27.00 [22.00, 31.00]       | 26.44 (7.09)               | 54-2                              | 27.00 [22.00, 32.00]       | 26.73 (7.15)               |
| TMN                | 4.02-2.50              | 2.94 [2.84, 3.04]          | 2.95 (0.16)                | 4.02-2.50                         | 2.95 [2.85, 3.05]          | 2.96 (0.16)                |
| TMA                | 4.15-2.73              | 3.25 [3.15, 3.36]          | 3.26 (0.16)                | 4.15-2.78                         | 3.25 [3.15, 3.36]          | 3.26 (0.16)                |
| MX                 | 14-0                   | 5.00 [4.00, 7.00]          | 5.22 (2.26)                | 14-0                              | 5.00 [4.00, 7.00]          | 5.21 (2.25)                |
| WM                 | 1.10-0                 | 0.49 [0.44, 0.55]          | 0.51 (0.09)                | 1.10-0                            | 0.49 [0.44, 0.55]          | 0.50 (0.08)                |
| QZ                 | 13-0                   | 8.00 [6.00, 9.00]          | 7.51 (2.11)                | 12-0                              | 7.00 [6.00, 9.00]          | 7.34 (2.12)                |
| VY                 | 20-0                   | 9.00 [7.00, 11.00]         | 9.12 (3.29)                | 10-0                              | 9.00 [6.00, 11.00]         | 8.73 (3.31)                |
| PR                 | 1.69-0.85              | 1.18 [1.04, 1.28]          | 1.16 (0.16)                | 1.64-0.85                         | 1.18 [1.04, 1.28]          | 1.16 (0.16)                |

<sup>1</sup> RT: Reaction Test; SB: Stroop Box; SI: Stroop Ink; SD: Symbols Digit; TMN: Trail Making Numeric; TMA: Trail Making Alpha Numeric; MX: Matrices; WM: Working memory; QZ: Quiz; VY: Vocabulary; PR: Pairing7; IQR: interquartile range; and S.Dev: Standard Deviation.



**Supplementary Table 4** | The association between cognitive phenotypes (including measures of general cognitive ability) and device used to take the cognitive tests.

| Phenotypes <sup>a</sup> | Devices <sup>b</sup> | Unadjusted |                 |                |                       | Adjusted <sup>c</sup> |                 |                |                       |
|-------------------------|----------------------|------------|-----------------|----------------|-----------------------|-----------------------|-----------------|----------------|-----------------------|
|                         |                      | Beta       | SE <sup>a</sup> | P <sup>a</sup> | R-square <sup>a</sup> | Beta                  | SE <sup>a</sup> | P <sup>a</sup> | R-square <sup>a</sup> |
| RT                      | Android              | 0.0336     | 0.0012          | <0.0001        | 0.4035                | 0.0419                | 0.0010          | <0.0001        | 0.5605                |
|                         | Windows              | 0.1581     | 0.0013          | <0.0001        |                       | 0.1338                | 0.0012          | <0.0001        |                       |
| SB                      | Android              | 0.0012     | 0.0012          | 0.3032         | 0.1487                | 0.0102                | 0.0010          | <0.0001        | 0.4303                |
|                         | Windows              | 0.0751     | 0.0013          | <0.0001        |                       | 0.0466                | 0.0011          | <0.0001        |                       |
| SI                      | Android              | -0.0030    | 0.0015          | 0.0383         | 0.0996                | 0.0062                | 0.0013          | <0.0001        | 0.3195                |
|                         | Windows              | 0.0714     | 0.0016          | <0.0001        |                       | 0.0413                | 0.0015          | <0.0001        |                       |
| SD                      | Android              | -0.9170    | 0.1111          | <0.0001        | 0.0577                | -0.1891               | 0.0929          | 0.0419         | 0.3460                |
|                         | Windows              | 3.6016     | 0.1230          | <0.0001        |                       | 0.9597                | 0.1066          | <0.0001        |                       |
| TMN                     | Android              | -0.0134    | 0.0024          | <0.0001        | 0.0812                | 0.0003                | 0.0021          | 0.8857         | 0.3006                |
|                         | Windows              | 0.1013     | 0.0027          | <0.0001        |                       | 0.0491                | 0.0024          | <0.0001        |                       |
| TMA                     | Android              | -0.0211    | 0.0026          | <0.0001        | 0.0191                | -0.0069               | 0.0023          | 0.0025         | 0.3006                |
|                         | Windows              | 0.0407     | 0.0029          | <0.0001        |                       | -0.0115               | 0.0026          | <0.0001        |                       |
| MX                      | Android              | -0.1644    | 0.0364          | <0.0001        | 0.0012                | -0.0188               | 0.0349          | 0.5897         | 0.0862                |
|                         | Windows              | -0.1668    | 0.0403          | <0.0001        |                       | -0.5108               | 0.0401          | <0.0001        |                       |
| WM                      | Android              | -0.0012    | 0.0014          | 0.3928         | 0.0002                | -0.0002               | 0.0014          | 0.8740         | 0.0035                |
|                         | Windows              | 0.0028     | 0.0015          | 0.0646         |                       | 0.0013                | 0.0016          | 0.4212         |                       |
| QZ                      | Android              | -0.1530    | 0.0339          | <0.0001        | 0.0028                | -0.1150               | 0.0339          | 0.0007         | 0.0098                |
|                         | Windows              | -0.2830    | 0.0375          | <0.0001        |                       | -0.3351               | 0.0388          | <0.0001        |                       |
| VY                      | Android              | -0.0185    | 0.0519          | 0.7219         | 0.0353                | -0.1639               | 0.0501          | 0.0011         | 0.1082                |
|                         | Windows              | -1.4846    | 0.0575          | <0.0001        |                       | -0.8346               | 0.0575          | <0.0001        |                       |
| PR                      | Android              | -0.0097    | 0.0026          | 0.0002         | 0.0041                | -0.0012               | 0.0026          | 0.6397         | 0.0756                |
|                         | Windows              | 0.0196     | 0.0029          | <0.0001        |                       | -0.0115               | 0.0029          | 0.0001         |                       |
| G6                      | Android              | 0.0017     | 0.0297          | 0.9540         | 0.1593                | 0.2255                | 0.0230          | <0.0001        | 0.5007                |
|                         | Windows              | 1.9057     | 0.0327          | <0.0001        |                       | 1.1145                | 0.0262          | <0.0001        |                       |
| G4                      | Android              | -0.0785    | 0.0220          | 0.0004         | 0.0088                | -0.0551               | 0.0220          | 0.0122         | 0.0208                |
|                         | Windows              | -0.3287    | 0.0243          | <0.0001        |                       | -0.3242               | 0.0251          | <0.0001        |                       |

<sup>a</sup> RT: Reaction Test; SB: Stroop Box; SI: Stroop Ink; SD: Symbols Digit; TMN: Trail Making Numeric; TMA: Trail Making Alpha Numeric; MX: Matrices; WM: Working memory; QZ: Quiz; VY: Vocabulary; PR: Pairing7; G6: a summary measure computed using RT, SB, SI, SD, TMN and TMA; G4: a summary measure computed using WM, MX, QZ and VY; SE: Standard Error; P: two-tailed p-value and R-square (R<sup>2</sup>): variance explained by the linear regression model.

<sup>b</sup> Reference Category for Devices: iOS users.

<sup>c</sup> Model adjusted for age and gender.

**Supplementary Table 5** | The differences in age, deprivation, and education among device users.

|                                            | Android<br>(n=6572) | iOS<br>(n=9599) | Windows<br>(n=4757) | P <sup>b</sup>       |
|--------------------------------------------|---------------------|-----------------|---------------------|----------------------|
| <b>Age (yrs), Mean (S.Dev)<sup>a</sup></b> | 46.3 (13.7)         | 49.2 (14.7)     | 58.7 (13.1)         | <0.0001 <sup>c</sup> |
| <b>Age (yrs), Median (IQR)<sup>a</sup></b> | 46 (22)             | 51 (23)         | 62 (15)             |                      |
| <b>Multiple Deprivation Index, n (%)</b>   |                     |                 |                     |                      |
| High (1-3)                                 | 1472 (0.7)          | 1393 (0.7)      | 586 (0.3)           | <0.0001 <sup>d</sup> |
| Medium (4-7)                               | 2635 (0.13)         | 3770 (0.19)     | 1878 (0.09)         |                      |
| Low (8-10)                                 | 2115 (0.11)         | 4049 (0.20)     | 2147 (0.11)         |                      |
| <b>Education, n (%)</b>                    |                     |                 |                     |                      |
| 1 (lowest)                                 | 84 (0.01)           | 134 (0.02)      | 73 (0.01)           | 0.024 <sup>d</sup>   |
| 2                                          | 609 (0.08)          | 909 (0.12)      | 490 (0.07)          |                      |
| 3                                          | 192 (0.03)          | 331 (0.04)      | 221 (0.03)          |                      |
| 4 (highest)                                | 1370 (0.18)         | 1884 (0.25)     | 1145 (0.15)         |                      |

<sup>a</sup>S.Dev: Standard Deviation and IQR: Interquartile Range<sup>b</sup>P: Two-tailed p-value.<sup>c</sup>P-value obtained using one-way ANOVA test.<sup>d</sup>P-value obtained using Chi-squared test.**Supplementary Table 6** | Study characteristics of participants with genetically inferred European ancestry.

| Characteristics                                                             | N=10,038                    | Missing (%) |
|-----------------------------------------------------------------------------|-----------------------------|-------------|
| <b>Age<sup>a</sup>, Mean (S.Dev<sup>b</sup>) / Median (IQR<sup>b</sup>)</b> | 51.91 (14.70) / 54 (41, 64) | -           |
| <b>Age category; n (%)</b>                                                  |                             |             |
| 17-25                                                                       | 464 (4.6)                   | -           |
| 26-35                                                                       | 1269 (12.6)                 | -           |
| 36-45                                                                       | 1559 (15.5)                 | -           |
| 46-55                                                                       | 2150 (21.4)                 | -           |
| 56-65                                                                       | 2527 (25.2)                 | -           |
| 66-75                                                                       | 1848 (18.4)                 | -           |
| 76+                                                                         | 221 (2.2)                   | -           |
| <b>Sex, Female/Male; n (%)</b>                                              | 6474 (64.5) / 3565 (35.5)   |             |
| <b>Ethnicity<sup>a</sup>, n (%)</b>                                         |                             |             |
| African                                                                     | 1 (0.0)                     |             |
| Mixed                                                                       | 20 (0.2)                    |             |
| Other                                                                       | 28 (0.3)                    |             |
| White                                                                       | 9763 (99.5)                 | 2.2         |
| <b>Smoking status<sup>a</sup>, n (%)</b>                                    |                             |             |
| Current Smoker                                                              | 251 (4.5)                   | 44.5        |
| Non-Smoker                                                                  | 3298 (59.2)                 |             |
| Past Smoker                                                                 | 2024 (36.3)                 |             |
| <b>Alcohol use<sup>a</sup> (yes), n (%)</b>                                 | 5010 (86.8)                 | 42.5        |
| <b>Body Mass Index<sup>a</sup>, n (%)</b>                                   |                             |             |
| Underweight                                                                 | 68 (1.2)                    |             |
| Healthy weight                                                              | 2523 (44.2)                 | 43.1        |
| Overweight                                                                  | 2054 (36.0)                 |             |
| Obese                                                                       | 1063 (18.6)                 |             |
| <b>Multiple Deprivation index, n (%)</b>                                    |                             |             |
| High (1-3)                                                                  | 1593 (16.4)                 |             |
| Medium (4-7)                                                                | 3998 (41.3)                 | 3.5         |
| Low (8-10)                                                                  | 4095 (42.3)                 |             |
| <b>Education<sup>a</sup>, n (%)</b>                                         |                             |             |
| 1 (lowest)                                                                  | 212 (3.9)                   |             |
| 2                                                                           | 1416 (26.3)                 |             |
| 3                                                                           | 548 (10.2)                  | 46.5        |
| 4 (highest)                                                                 | 3199 (59.5)                 |             |
| <b>Worked nights 72 hours before test<sup>a</sup> (yes), n (%)</b>          | 166 (1.7)                   | -           |
| <b>First language is English<sup>a</sup>, n (%)</b>                         | 9656 (97.4)                 | 1.3         |

<sup>a</sup>Self-reported in response to questionnaire provided either by NIHR BioResource or Cognitive Test application.<sup>b</sup>S.Dev: Standard Deviation and IQR: Interquartile Range

**Supplementary Table 7** | Self-reported clinical information available on G&C study participants with genetically inferred European ancestry.

| Diagnosis <sup>1</sup>              | N=10,038     |
|-------------------------------------|--------------|
| Colour Blindness, yes; n (%)        | 284 (2.8)    |
| Learning Disability, yes; n (%)     | 297 (3.0)    |
| Arthritis, yes; n (%)               | 617 (6.1)    |
| Diabetes, yes; n (%)                | 313 (3.1)    |
| Heart Conditions, yes; n (%)        | 201 (2.0)    |
| High Blood Pressure, yes; n (%)     | 1,082 (10.8) |
| Mental Health Disorders, yes; n (%) | 83 (0.8)     |

<sup>1</sup> All diagnoses were self-reported in response to questionnaire provided either by Bioresource or Cognitive Test application.

**Supplementary Table 8** | The association between cognitive phenotypes (including measures of general cognitive ability), age, and sex.

| Phenotypes <sup>a</sup> | Covariates                | Model-1 <sup>c</sup> |                 |                   |                       | Model-2 <sup>c</sup> |         |                   |                       |
|-------------------------|---------------------------|----------------------|-----------------|-------------------|-----------------------|----------------------|---------|-------------------|-----------------------|
|                         |                           | Beta                 | SE <sup>a</sup> | P <sup>a, d</sup> | R-square <sup>a</sup> | Beta                 | SE      | P <sup>a, d</sup> | R-square <sup>a</sup> |
| RT                      | Age                       | 0.0029               | 0.00004         | < 0.0001          | 0.5625                | 0.0029               | 0.00005 | < 0.0001          | 0.5647                |
|                         | Age <sup>2</sup>          | 0.00002              | 0.000003        | < 0.0001          |                       | 0.00002              | 0.00000 | < 0.0001          |                       |
|                         | Gender <sup>b</sup>       | -0.0172              | 0.0013          | < 0.0001          |                       | -0.0168              | 0.0014  | < 0.0001          |                       |
|                         | Age* Gender               | 0.0001               | 0.0001          | 0.0731            |                       | 0.0001               | 0.00007 | 0.0634            |                       |
|                         | Age <sup>2</sup> * Gender | 0.00001              | 0.000004        | 0.0158            |                       | 0.000009             | 0.00000 | 0.0702            |                       |
| SB                      | Age                       | 0.0033               | 0.00004         | < 0.0001          | 0.4383                | 0.0033               | 0.00004 | < 0.0001          | 0.4379                |
|                         | Age <sup>2</sup>          | 0.00003              | 0.000002        | < 0.0001          |                       | 0.00003              | 0.00000 | < 0.0001          |                       |
|                         | Gender <sup>b</sup>       | -0.0067              | 0.0009          | < 0.0001          |                       | -0.0066              | 0.0009  | < 0.0001          |                       |
|                         | Age* Gender               | -0.0002              | 0.00006         | 0.0049            |                       | -0.0002              | 0.00007 | 0.0632            |                       |
| SI                      | Age                       | 0.0034               | 0.00004         | < 0.0001          | 0.3248                | 0.0034               | 0.00004 | < 0.0001          | 0.3289                |
|                         | Age <sup>2</sup>          | 0.00003              | 0.000003        | < 0.0001          |                       | 0.00003              | 0.00000 | < 0.0001          |                       |
|                         | Gender <sup>b</sup>       | -0.0075              | 0.0016          | < 0.0001          |                       | -0.0069              | 0.0017  | < 0.0001          |                       |
|                         | Age <sup>2</sup> * Gender | 0.000009             | 0.000005        | 0.0853            |                       | 0.000008             | 0.00000 | 0.12              |                       |
| SD                      | Age                       | 0.289                | 0.0038          | < 0.0001          | 0.354                 | 0.295                | 0.0040  | < 0.0001          | 0.3625                |
|                         | Age <sup>2</sup>          | 0.0033               | 0.0002          | < 0.0001          |                       | 0.0032               | 0.0002  | < 0.0001          |                       |
|                         | Gender <sup>b</sup>       | 0.61                 | 0.116           | < 0.0001          |                       | 0.6                  | 0.12    | < 0.0001          |                       |
|                         | Age*Gender                | -0.0176              | 0.006           | 0.0094            |                       | -0.0144              | 0.0062  | 0.0632            |                       |
|                         | Age <sup>2</sup> *Gender  | -0.0010              | 0.0004          | 0.0158            |                       | -0.0009              | 0.0004  | 0.0468            |                       |
| TMN                     | Age                       | 0.0054               | 0.00007         | < 0.0001          | 0.305                 | 0.0055               | 0.00007 | < 0.0001          | 0.3067                |
|                         | Age <sup>2</sup>          | 0.00005              | 0.000004        | < 0.0001          |                       | 0.00005              | 0.00000 | < 0.0001          |                       |
|                         | Gender <sup>b</sup>       | 0.0158               | 0.0020          | < 0.0001          |                       | 0.0168               | 0.0020  | < 0.0001          |                       |
| TMA                     | Age                       | 0.0056               | 0.00007         | < 0.0001          | 0.2462                | 0.0058               | 0.00008 | < 0.0001          | 0.2545                |
|                         | Age <sup>2</sup>          | 0.00009              | 0.000004        | < 0.0001          |                       | 0.00009              | 0.00000 | < 0.0001          |                       |
|                         | Gender <sup>b</sup>       | 0.0093               | 0.0021          | < 0.0001          |                       | 0.01                 | 0.0022  | < 0.0001          |                       |
| WM                      | Age                       | 0.0004               | 0.00004         | < 0.0001          | 0.0109                | 0.0005               | 0.00005 | < 0.0001          | 0.0131                |
|                         | Age <sup>2</sup>          | 0.00003              | 0.000003        | < 0.0001          |                       | 0.00003              | 0.00000 | < 0.0001          |                       |
|                         | Gender <sup>b</sup>       | -0.0076              | 0.0013          | < 0.0001          |                       | -0.0073              | 0.0013  | < 0.0001          |                       |
| MX                      | Age                       | 0.0487               | 0.0011          | < 0.0001          | 0.0882                | 0.0513               | 0.0012  | < 0.0001          | 0.0995                |
|                         | Age <sup>2</sup>          | 0.0005               | 0.00007         | < 0.0001          |                       | 0.0004               | 0.00007 | < 0.0001          |                       |
|                         | Gender <sup>b</sup>       | -0.558               | 0.0321          | < 0.0001          |                       | -0.545               | 0.0332  | < 0.0001          |                       |
| QZ                      | Age                       | 0.0106               | 0.0014          | < 0.0001          | 0.0116                | 0.0125               | 0.0014  | < 0.0001          | 0.0180                |
|                         | Age <sup>2</sup>          | 0.0003               | 0.00007         | < 0.0001          |                       | 0.0004               | 0.00007 | < 0.0001          |                       |
|                         | Gender <sup>b</sup>       | -0.283               | 0.0313          | < 0.0001          |                       | -0.288               | 0.0327  | < 0.0001          |                       |
|                         | Age*Gender                | 0.0050               | 0.0022          | 0.0401            |                       | 0.0050               | 0.0023  | 0.0632            |                       |
| VY                      | Age                       | -0.0638              | 0.0019          | < 0.0001          | 0.1093                | -0.0615              | 0.0020  | < 0.0001          | 0.112                 |
|                         | Sex <sup>b</sup>          | -0.544               | 0.0463          | < 0.0001          |                       | -0.54                | 0.0484  | < 0.0001          |                       |
|                         | Age*Gender                | 0.0174               | 0.0031          | < 0.0001          |                       | 0.0185               | 0.0033  | < 0.0001          |                       |
| PR                      | Age                       | 0.0031               | 0.00008         | < 0.0001          | 0.0773                | 0.00312              | 0.00008 | < 0.0001          | 0.0772                |
|                         | Gender <sup>b</sup>       | 0.0099               | 0.0024          | 0.0001            |                       | 0.01                 | 0.0024  | < 0.0001          |                       |
| G6                      | Age                       | 0.0872               | 0.0007          | < 0.0001          | 0.5104                | 0.0888               | 0.0008  | < 0.0001          | 0.5165                |
|                         | Age <sup>2</sup>          | 0.0009               | 0.00004         | < 0.0001          |                       | 0.0009               | 0.00005 | < 0.0001          |                       |
|                         | Gender <sup>b</sup>       | -0.0388              | 0.0208          | 0.0631            |                       | -0.0298              | 0.0216  | 0.17              |                       |
| G4                      | Age                       | 0.0054               | 0.0009          | < 0.0001          | 0.0253                | 0.00689              | 0.00091 | < 0.0001          | 0.0368                |
|                         | Age <sup>2</sup>          | 0.0004               | 0.00004         | < 0.0001          |                       | 0.0004               | 0.00004 | < 0.0001          |                       |
|                         | Gender <sup>b</sup>       | -0.316               | 0.0203          | < 0.0001          |                       | -0.314               | 0.021   | < 0.0001          |                       |
|                         | Age*Gender                | 0.0048               | 0.0014          | 0.0035            |                       | 0.0052               | 0.0015  | 0.0018            |                       |

<sup>a</sup> RT: Reaction Test; SB: Stroop Box; SI: Stroop Ink; SD: Symbols Digit; TMN: Trail Making Numeric; TMA: Trail Making Alpha Numeric; MX: Matrices; WM: Working memory; QZ: Quiz; VY: Vocabulary; PR: Pairing7; G6: a summary measure computed using RT, SB, SI, SD, TMN and TMA; G4: a summary measure computed using WM, MX, QZ and VY; SE: Standard Error; P: two-tailed p-value and R-square (R<sup>2</sup>): adjusted R<sup>2</sup> obtained from respective linear regression model.

<sup>b</sup> Reference Category for gender: Female.

<sup>c</sup> Model-1 was adjusted for device use, except for working memory test. Model-2 were adjusted for Model-1 + Deprivation Index (as categorical variable) + Self-reported Ethnicity.

<sup>d</sup> P-values were presented after considering Bonferroni-Holm adjustment, considering the number of cognitive phenotypes each covariate was tested against.

**Supplementary Table 9** | The association between cognitive phenotypes (including measures of general cognitive ability) and education.

| Phenotypes <sup>a</sup> | Education               |                   |                                      |                   |                                      |                   |                         |
|-------------------------|-------------------------|-------------------|--------------------------------------|-------------------|--------------------------------------|-------------------|-------------------------|
|                         | 1 (lowest) <sup>b</sup> |                   | 2 <sup>nd</sup> Highest <sup>b</sup> |                   | 3 <sup>rd</sup> Highest <sup>b</sup> |                   | P-trend <sup>a, c</sup> |
|                         | B (SE) <sup>a</sup>     | P <sup>a, c</sup> | B (SE) <sup>a</sup>                  | P <sup>a, c</sup> | B (SE) <sup>a</sup>                  | P <sup>a, c</sup> |                         |
| RT <sup>d</sup>         | 0.0167                  | <0.0001           | 0.005 (0.0018)                       | 0.0097            | 0.0023 (0.0026)                      | 0.75              | <0.0001                 |
| SB <sup>d</sup>         | 0.0232                  | <0.0001           | 0.0072 (0.0017)                      | <0.0001           | 0.005 (0.0025)                       | 0.15              | <0.0001                 |
| SI <sup>d</sup>         | 0.0299                  | <0.0001           | 0.0048 (0.0021)                      | 0.0236            | 0.0072 (0.0032)                      | 0.12              | <0.0001                 |
| SD                      | 3.47 (0.341)            | <0.0001           | 1.10 (0.150)                         | <0.0001           | 0.868 (0.224)                        | 0.001             | <0.0001                 |
| TMN <sup>d</sup>        | 0.0522                  | <0.0001           | 0.0134 (0.0037)                      | 0.00095           | 0.0044 (0.0054)                      | 0.75              | <0.0001                 |
| TMA <sup>d</sup>        | 0.0947                  | <0.0001           | 0.0265 (0.0038)                      | <0.0001           | 0.0133 (0.0057)                      | 0.11              | <0.0001                 |
| WM <sup>d</sup>         | 0.0396                  | <0.0001           | 0.0116 (0.0023)                      | <0.0001           | 0.0087 (0.0034)                      | 0.073             | <0.0001                 |
| MX                      | 2.18 (0.128)            | <0.0001           | 0.858 (0.0564)                       | <0.0001           | 0.673 (0.084)                        | <0.0001           | <0.0001                 |
| QZ                      | 2.19 (0.125)            | <0.0001           | 0.965 (0.0551)                       | <0.0001           | 0.689 (0.082)                        | <0.0001           | <0.0001                 |
| VY                      | 4.44 (0.180)            | <0.0001           | 2.47 (0.0796)                        | <0.0001           | 1.89 (0.118)                         | <0.0001           | <0.0001                 |
| PR <sup>d</sup>         | 0.0343 (0.1)            | 0.0004            | 0.0142 (0.0042)                      | 0.0023            | 0.0125 (0.0063)                      | 0.15              | <0.0001                 |
| G6                      | 0.876 (0.086)           | <0.0001           | 0.245 (0.0379)                       | <0.0001           | 0.160 (0.0563)                       | 0.037             | <0.0001                 |
| G4                      | 1.94 (0.0781)           | <0.0001           | 0.886 (0.0344)                       | <0.0001           | 0.670 (0.0511)                       | <0.0001           | <0.0001                 |

<sup>a</sup> RT: Reaction Test; SB: Stroop Box; SI: Stroop Ink; SD: Symbols Digit; TMN: Trail Making Numeric; TMA: Trail Making Alpha Numeric; MX: Matrices; WM: Working memory; QZ: Quiz; VY: Vocabulary; PR: Pairing7; G6: a summary measure computed using RT, SB, SI, SD, TMN and TMA; G4: a summary measure computed using WM, MX, QZ and VY; B: Beta; SE: Standard Error; P: two-tailed p-value; P-trend: two-tailed p-value for trend.

<sup>b</sup> Reference group: Highest education; Linear regression models were commonly adjusted for age, age-square (except VY and PR), gender and types of devices used to take the test. An age by gender interaction term/s was included in the model for RT, SB, SI, SD, QZ, VY and G4.

<sup>c</sup> P-values were presented after Bonferroni Holm adjustment for 13 tests.

<sup>d</sup> Log10 transformation was performed for these test scores.

**Supplementary Table 10** | The association between cognitive phenotypes (including measures of general cognitive ability) and multiple deprivation.

| Phenotypes <sup>a</sup> | Multiple Deprivation |                   |                           |                   |                         |
|-------------------------|----------------------|-------------------|---------------------------|-------------------|-------------------------|
|                         | High <sup>b</sup>    |                   | Intermediate <sup>b</sup> |                   | P-trend <sup>a, c</sup> |
|                         | B (SE) <sup>a</sup>  | P <sup>a, c</sup> | B (SE) <sup>a</sup>       | P <sup>a, c</sup> |                         |
| RT <sup>d</sup>         | 0.0081 (0.0014)      | <0.0001           | 0.0028 (0.001)            | 0.0197            | <0.0001                 |
| SB <sup>d</sup>         | 0.0073 (0.0013)      | <0.0001           | 0.0025(0.001)             | 0.0197            | <0.0001                 |
| SI <sup>d</sup>         | 0.0102 (0.0016)      | <0.0001           | 0.0043 (0.0012)           | 0.0022            | <0.0001                 |
| SD                      | 1.24 (0.118)         | <0.0001           | 0.475 (0.0892)            | <0.0001           | <0.0001                 |
| TMN <sup>d</sup>        | 0.0173 (0.0027)      | <0.0001           | 0.0077 (0.0021)           | 0.0009            | <0.0001                 |
| TMA <sup>d</sup>        | 0.0276 (0.0029)      | <0.0001           | 0.011 (0.0022)            | <0.0001           | <0.0001                 |
| WM <sup>d</sup>         | 0.0115 (0.0017)      | <0.0001           | 0.0059 (0.0013)           | <0.0001           | <0.0001                 |
| MX                      | 0.609 (0.0445)       | <0.0001           | 0.240 (0.0337)            | <0.0001           | <0.0001                 |
| QZ                      | 0.374 (0.0435)       | <0.0001           | 0.204 (0.0328)            | <0.0001           | <0.0001                 |
| VY                      | 0.537 (0.0644)       | <0.0001           | 0.198 (0.0486)            | 0.0003            | <0.0001                 |
| PR <sup>d</sup>         | 0.0015 (0.0033)      | 0.64              | -0.0002 (0.0025)          | 0.94              | 0.71                    |
| G6                      | 0.301 (0.0290)       | <0.0001           | 0.116 (0.0219)            | <0.0001           | <0.0001                 |
| G4                      | 0.372 (0.0280)       | <0.0001           | 0.164 (0.0211)            | <0.0001           | <0.0001                 |

<sup>a</sup> RT: Reaction Test; SB: Stroop Box; SI: Stroop Ink; SD: Symbols Digit; TMN: Trail Making Numeric; TMA: Trail Making Alpha Numeric; MX: Matrices; WM: Working memory; QZ: Quiz; VY: Vocabulary; PR: Pairing7; G6: a summary measure computed using RT, SB, SI, SD, TMN and TMA; G4: a summary measure computed using WM, MX, QZ and VY; B: Beta; SE: Standard Error; P: two-tailed p-value; P-trend: two-tailed p-value for trend.

<sup>b</sup> Reference group: Low Multiple Deprivation Group; Linear regression models were commonly adjusted for age, age-square (except VY and PR), gender and types of devices used to take the test. An age by gender interaction term/s was included in the model for RT, SB, SI, SD, QZ, VY and G4.

<sup>c</sup> P-values were presented after Bonferroni Holm adjustment for 13 tests.

<sup>d</sup> Log10 transformation was performed for these test scores.

**Supplementary Table 11** | The association between cognitive phenotypes (including measures of general cognitive ability) and clinical information available in G&C cohort.

| Phenotypes <sup>a</sup> | Color Blindness <sup>b</sup> |                   | Learning Disability <sup>b</sup> |                   | Mental Health Issue <sup>b</sup> |                   | High Blood Pressure <sup>b</sup> |                   | Heart Problem <sup>b</sup> |                   | Arthritis <sup>b</sup> |                   | Diabetes <sup>b</sup> |                   |
|-------------------------|------------------------------|-------------------|----------------------------------|-------------------|----------------------------------|-------------------|----------------------------------|-------------------|----------------------------|-------------------|------------------------|-------------------|-----------------------|-------------------|
|                         | B (SE) <sup>a</sup>          | P <sup>a, c</sup> | B (SE) <sup>a</sup>              | P <sup>a, c</sup> | B (SE) <sup>a</sup>              | P <sup>a, c</sup> | B (SE) <sup>a</sup>              | P <sup>a, c</sup> | B(SE)                      | P <sup>a, c</sup> | B(SE) <sup>a</sup>     | P <sup>a, c</sup> | B (SE) <sup>a</sup>   | P <sup>a, c</sup> |
| RT <sup>d</sup>         | -0.0009<br>(0.0027)          | 1                 | 0.0154<br>(0.0025)               | <0.0001           | 0.0142<br>(0.0048)               | 0.0206            | 0.0033<br>(0.0016)               | <b>0.14</b>       | 0.0108<br>(0.0035)         | 0.0181            | 0.0076<br>(0.0020)     | 0.0008            | 0.0153<br>(0.0028)    | <0.0001           |
| SB <sup>d</sup>         | 0.0071<br>(0.0026)           | 0.07              | 0.0225<br>(0.0023)               | <0.0001           | 0.0140<br>(0.0045)               | 0.0141            | 0.0073<br>(0.0015)               | <0.0001           | 0.0110<br>(0.0033)         | 0.0090            | 0.0082<br>(0.0019)     | 0.0001            | 0.0150<br>(0.0026)    | <0.0001           |
| SI <sup>d</sup>         | 0.0066<br>(0.0033)           | 0.46              | 0.0309<br>(0.0031)               | <0.0001           | 0.0144<br>(0.0059)               | 0.06992           | 0.0093<br>(0.0020)               | <0.0001           | 0.0124<br>(0.0043)         | 0.0243            | 0.0106<br>(0.0025)     | 0.0001            | 0.0190<br>(0.0034)    | <0.0001           |
| SD                      | 0.4978<br>(0.2406)           | 0.42              | 2.6760<br>(0.2225)               | <0.0001           | 1.4246<br>(0.4236)               | 0.0078            | 1.1309<br>(0.1440)               | <0.0001           | 1.2741<br>(0.3112)         | 0.0005            | 1.1219<br>(0.1776)     | <0.0001           | 1.7709<br>(0.2496)    | <0.0001           |
| TMN <sup>d</sup>        | 0.0040<br>(0.0055)           | 1                 | 0.0495<br>(0.0051)               | <0.0001           | 0.0135<br>(0.0098)               | <b>0.26</b>       | 0.0071<br>(0.0033)               | <b>0.13</b>       | 0.0197<br>(0.0072)         | 0.0243            | 0.0136<br>(0.0041)     | 0.0036            | 0.0181<br>(0.0057)    | 0.0065            |
| TMA <sup>d</sup>        | 0.0028<br>(0.0059)           | 1                 | 0.0810<br>(0.0055)               | <0.0001           | 0.0381<br>(0.0104)               | 0.0032            | 0.0200<br>(0.0036)               | <0.0001           | 0.0237<br>(0.0077)         | 0.0181            | 0.0289<br>(0.0044)     | <0.0001           | 0.0451<br>(0.0061)    | <0.0001           |
| WM <sup>d</sup>         | 0.0029<br>(0.0036)           | 1                 | 0.0504<br>(0.0033)               | <0.0001           | 0.0212<br>(0.0063)               | 0.0078            | 0.0059<br>(0.0021)               | 0.0269            | 0.0089<br>(0.0046)         | <b>0.16</b>       | 0.0105<br>(0.0026)     | 0.0004            | 0.0150<br>(0.0037)    | 0.0002            |
| MX                      | 0.2249<br>(0.0909)           | 0.16              | 0.5659<br>(0.0839)               | <0.0001           | 0.2916<br>(0.1602)               | <b>0.21</b>       | 0.3132<br>(0.0545)               | <0.0001           | 0.3382<br>(0.1177)         | 0.0243            | 0.3143<br>(0.0672)     | <0.0001           | 0.6082<br>(0.0939)    | <0.0001           |
| QZ                      | -0.0136<br>(0.0882)          | 1                 | 1.0794<br>(0.0810)               | <0.0001           | 0.4374<br>(0.1552)               | 0.0291            | 0.1514<br>(0.0529)               | 0.0250            | 0.3393<br>(0.1144)         | 0.0211            | 0.2114<br>(0.0651)     | 0.0036            | 0.2205<br>(0.0912)    | 0.0468            |
| VY                      | 0.0224<br>(0.1305)           | 1                 | 1.1191<br>(0.1204)               | <0.0001           | 0.3482<br>(0.2299)               | <b>0.26</b>       | 0.1287<br>(0.0782)               | <b>0.20</b>       | 0.3258<br>(0.1689)         | <b>0.16</b>       | 0.0634<br>(0.0965)     | <b>1</b>          | 0.2885<br>(0.1352)    | <b>0.0657</b>     |
| PR <sup>d</sup>         | 0.0063<br>(0.0067)           | 1                 | 0.018<br>(0.0061)                | 0.0033            | 0.0277<br>(0.0117)               | 0.0721            | 0.0012<br>(0.0040)               | <b>0.77</b>       | -0.0006<br>(0.0086)        | <b>0.94</b>       | 0.0023<br>(0.0049)     | <b>1</b>          | 0.0031<br>(0.0069)    | <b>0.65</b>       |
| G6                      | 0.1124<br>(0.0589)           | 0.50              | 0.7937<br>(0.0544)               | <0.0001           | 0.4067<br>(0.1037)               | 0.0011            | 0.2279<br>(0.0354)               | <0.0001           | 0.3473<br>(0.0763)         | <0.0001           | 0.2938<br>(0.0436)     | <0.0001           | 0.4850<br>(0.0612)    | <0.0001           |
| G4                      | 0.0637<br>(0.0569)           | 1                 | 0.8346<br>(0.0525)               | <0.0001           | 0.3271<br>(0.1002)               | 0.0098            | 0.1587<br>(0.0342)               | <0.0001           | 0.2510<br>(0.0737)         | 0.0073            | 0.1892<br>(0.0421)     | <0.0001           | 0.3111<br>(0.0591)    | <0.0001           |

<sup>a</sup> RT: Reaction Test; SB: Stroop Box; SI: Stroop Ink; SD: Symbols Digit; TMN: Trail Making Numeric; TMA: Trail Making Alpha Numeric; MX: Matrices; WM: Working memory; QZ: Quiz; VY: Vocabulary; PR: Pairing7; G6: a summary measure computed using RT, SB, SI, SD, TMN and TMA; G4: a summary measure computed using WM, MX, QZ and VY; B: Beta value from regression model; SE: Standard Error; P: two-tailed p-value.

<sup>b</sup> Each of the linear regression model was adjusted for age (centred to mean), age square, gender and types of devices used.

<sup>c</sup> P-value presented after Bonferroni–Holm corrections for 13 tests. Non-significant p-values are highlighted in black.

<sup>d</sup> Log10 transformation was performed for these test scores.

**Supplementary Table 12** | The Association between cognitive traits (including a measure of general cognitive ability), age and APOE.

| Phenotypes <sup>a</sup> | APOE                |                  |                       |                  |                     |                         |                          |                  | Age by APOE interactions |                  |                      |                          |                          |                          |                                |                  |
|-------------------------|---------------------|------------------|-----------------------|------------------|---------------------|-------------------------|--------------------------|------------------|--------------------------|------------------|----------------------|--------------------------|--------------------------|--------------------------|--------------------------------|------------------|
|                         | Age                 |                  | Age <sup>2</sup>      |                  | e2/e3 <sup>b</sup>  |                         | e4 carriers <sup>b</sup> |                  | Age x e2/e3              |                  | Age x e4 carriers    |                          | Age <sup>2</sup> x e2/e3 |                          | Age <sup>2</sup> x e4 carriers |                  |
|                         | B (SE) <sup>a</sup> | P <sup>a,c</sup> | B (SE) <sup>a</sup>   | P <sup>a,c</sup> | B (SE) <sup>a</sup> | P <sup>a,c</sup>        | B (SE) <sup>a</sup>      | P <sup>a,c</sup> | B (SE) <sup>a</sup>      | P <sup>a,c</sup> | B (SE) <sup>a</sup>  | P <sup>a,c</sup>         | B (SE) <sup>a</sup>      | P <sup>a,c</sup>         | B (SE) <sup>a</sup>            | P <sup>a,c</sup> |
| RT <sup>d</sup>         | 0.003<br>(0.00006)  | <0.0001          | 0.00002<br>(0.000004) | <0.0001          | -0.0009<br>(0.002)  | 1                       | 0.002<br>(0.002)         | 1                | 0.0002<br>(0.0001)       | 1                | 0.0002<br>(0.0001)   | 0.39<br>(0.0001)         | 0.00001<br>(0.000009)    | 1                        | 0.000008<br>(0.000007)         | 1                |
| SB <sup>d</sup>         | 0.003<br>(0.00006)  | <0.0001          | 0.00003<br>(0.000004) | <0.0001          | -0.0005<br>(0.003)  | 1                       | -0.0004<br>(0.002)       | 1                | -0.000001<br>(0.0001)    | 1                | 0.0002<br>(0.0001)   | 0.39<br>(0.0001)         | -0.0000003<br>(0.000008) | 1                        | 0.00001<br>(0.000006)          | 0.55             |
| SI <sup>d</sup>         | 0.003<br>(0.00008)  | <0.0001          | 0.00003<br>(0.000005) | <0.0001          | -0.008<br>(0.003)   | <b>0.3</b> <sup>#</sup> | 0.001<br>(0.003)         | 1                | 0.0002<br>(0.0002)       | 1                | 0.0002<br>(0.0001)   | 0.39<br>(0.0001)         | 0.00003<br>(0.00001)     | <b>0.13</b> <sup>#</sup> | 0.000004<br>(0.000008)         | 1                |
| SD                      | 0.30<br>(0.005)     | <0.0001          | 0.002<br>(0.0003)     | <0.0001          | -0.02<br>(0.25)     | 1                       | -0.17<br>(0.19)          | 1                | -0.01<br>(0.01)          | 1                | 0.02<br>(0.009)      | <b>0.14</b> <sup>#</sup> | -0.0003<br>(0.0008)      | 1                        | 0.001<br>(0.0006)              | 0.55             |
| TMN <sup>d</sup>        | 0.006<br>(0.0001)   | <0.0001          | 0.00005<br>(0.000008) | <0.0001          | -0.001<br>(0.006)   | 1                       | -0.0008<br>(0.004)       | 1                | 0.0002<br>(0.0003)       | 1                | -0.00003<br>(0.0002) | 0.87<br>(0.0002)         | 0.00002<br>(0.00002)     | 1                        | 0.00001<br>(0.00001)           | 1                |
| TMA <sup>d</sup>        | 0.006<br>(0.0001)   | <0.0001          | 0.00008<br>(0.000008) | <0.0001          | 0.002<br>(0.006)    | 1                       | -0.006<br>(0.005)        | 1                | 0.0001<br>(0.0003)       | 1                | 0.0004<br>(0.0002)   | 0.39<br>(0.0002)         | -0.000003<br>(0.00002)   | 1                        | 0.00003<br>(0.00001)           | 0.55             |
| QZ                      | 0.02<br>(0.002)     | <0.0001          | 0.0005<br>(0.0001)    | 0.0002           | 0.03<br>(0.09)      | 1                       | -0.03<br>(0.07)          | 1                | 0.002<br>(0.004)         | 1                | 0.007<br>(0.003)     | 0.39<br>(0.0003)         | -0.0003<br>(0.0003)      | 1                        | 0.0002<br>(0.0002)             | 1                |
| PR <sup>d</sup>         | 0.003<br>(0.0001)   | <0.0001          | -                     | -                | 0.003<br>(0.005)    | 1                       | -0.001<br>(0.004)        | 0.6              | -0.00006<br>(0.0003)     | 1                | 0.0003<br>(0.0003)   | 0.40                     | -                        | -                        | -                              | -                |
| G6                      | 0.09<br>(0.001)     | <0.0001          | 0.0008<br>(0.00008)   | <0.0001          | -0.04<br>(0.06)     | 1                       | -0.02<br>(0.05)          | 1                | 0.002<br>(0.003)         | 1                | 0.005<br>(0.002)     | <b>0.17</b> <sup>#</sup> | 0.0002<br>(0.0002)       | 1                        | 0.0003<br>(0.0001)             | 0.55             |

<sup>a</sup> RT: Reaction Test; SB: Stroop Box; SI: Stroop Ink; SD: Symbols Digit; TMN: Trail Making Numeric; TMA: Trail Making Alpha Numeric; QZ: Quiz; PR: Pairing 7; G6: a summary measure computed using RT, SB, SI, SD, TMN and TMA; B: Beta value from linear mixed-effect model; SE: Standard Error; P: two-tailed p-value; Associations were adjusted for sex, the first five genomic principal components, devices, batch, array (as random effect).

<sup>b</sup> e3/e3 carriers were served as reference.

<sup>c</sup> P-values were presented after considering Bonferroni-Holm adjustment, considering the number of cognitive traits each covariate was tested against. P-values significant before correction are indicated with “#”.

<sup>d</sup> Log10 transformation was performed for these test scores.

<sup>#</sup>Significant at <0.05 before Bonferroni Holm correction.



**Supplementary Table 13** | Details of source polygenic risk score (PRS) and derived PRS in the G&C study.

| No. | PGS ID    | # SNPs in PRS | # SNPs used in G&C | PRS Ancestry | Source GWAS      | APOE inclusion | Risk Groups in the present study          |
|-----|-----------|---------------|--------------------|--------------|------------------|----------------|-------------------------------------------|
| 1   | PGS002289 | 23            | 20                 | European     | Lambert et al.   | Yes (2 SNPs)   | High (top 5 <sup>th</sup> percentiles) Vs |
| 2   | PGS002289 | 23            | 18                 | European     | (PMID: 24162737) | None           | Low ( $\leq$ 95 <sup>th</sup> percentile) |

**Supplementary Table 14** | The Association between cognitive phenotypes (including a measure of general cognitive ability), age and Alzheimer's disease polygenic risk groups (included APOE).

| Phenotypes <sup>a</sup> | Age                 |                   | Age <sup>2</sup>     |                   | PRS (Low) <sup>b</sup> |                   | Age x PRS (Low)     |                           | Age <sup>2</sup> x PRS (Low) |                   |
|-------------------------|---------------------|-------------------|----------------------|-------------------|------------------------|-------------------|---------------------|---------------------------|------------------------------|-------------------|
|                         | B (SE) <sup>a</sup> | P <sup>a, c</sup> | B (SE) <sup>a</sup>  | P <sup>a, c</sup> | B (SE) <sup>a</sup>    | P <sup>a, c</sup> | B (SE) <sup>a</sup> | P <sup>a, c</sup>         | B (SE) <sup>a</sup>          | P <sup>a, c</sup> |
| RT <sup>d</sup>         | 0.003<br>(0.0002)   | <0.0001           | 0.00003<br>(0.00001) | 0.09              | -0.0027<br>(0.0042)    | 1                 | -0.0001<br>(0.0002) | 1                         | -0.000007<br>(0.00001)       | 1                 |
| SB <sup>d</sup>         | 0.004<br>(0.0002)   | <0.0001           | 0.00006<br>(0.00001) | 0.0001            | 0.001<br>(0.003)       | 1                 | -0.0004<br>(0.0002) | 0.34 <sup>#</sup>         | -0.00003<br>(0.00001)        | 0.32              |
| SI <sup>d</sup>         | 0.004<br>(0.0002)   | <0.0001           | 0.00007<br>(0.00007) | 0.0002            | 0.003<br>(0.005)       | 1                 | -0.0007<br>(0.0003) | <b>0.039<sup>##</sup></b> | -0.00004<br>(0.00002)        | 0.28 <sup>#</sup> |
| SD                      | 0.33<br>(0.02)      | <0.0001           | 0.005<br>(0.001)     | 0.0002            | 0.52<br>(0.36)         | 1                 | -0.03<br>(0.02)     | 0.56                      | -0.002<br>(0.001)            | 0.30              |
| TMN <sup>d</sup>        | 0.006<br>(0.0004)   | <0.0001           | 0.0001<br>(0.00003)  | 0.0017            | 0.004<br>(0.009)       | 1                 | -0.0001<br>(0.0004) | 1                         | -0.00005<br>(0.00003)        | 0.42              |
| TMA <sup>d</sup>        | 0.006<br>(0.0005)   | <0.0001           | 0.0001<br>(0.00003)  | <0.0001           | 0.01<br>(0.009)        | 1                 | -0.0005<br>(0.0005) | 0.89                      | -0.00004<br>(0.00003)        | 0.53              |
| QZ                      | 0.03<br>(0.007)     | <0.0001           | 0.0007<br>(0.0005)   | 0.10              | 0.02<br>(0.14)         | 1                 | -0.01<br>(0.007)    | 0.56                      | -0.0002<br>(0.0005)          | 1                 |
| PR <sup>d</sup>         | 0.004<br>(0.0005)   | <0.0001           | -                    | -                 | 0.0006<br>(0.007)      | 1                 | -0.0008<br>(0.0005) | 0.56                      | -                            | -                 |
| G6                      | 0.1<br>(0.005)      | <0.0001           | 0.002<br>(0.0003)    | <0.0001           | 0.09<br>(0.09)         | 1                 | -0.009<br>(0.005)   | 0.34 <sup>#</sup>         | -0.0007<br>(0.0003)          | 0.19 <sup>#</sup> |

<sup>a</sup> RT: Reaction Test; SB: Stroop Box; SI: Stroop Ink; SD: Symbols Digit; TMN: Trail Making Numeric; TMA: Trail Making Alpha Numeric; QZ: Quiz; PR: Pairing7; G6: a summary measure computed using RT, SB, SI, SD, TMN and TMA; B: Beta value from linear mixed effect model; SE: Standard Error; P: two-tailed p-value; Associations were adjusted for sex, the first five genomic principal components, devices, batch, array (as random effect).

<sup>b</sup> High PRS group was used as reference.

<sup>c</sup> P-values are presented after Bonferroni-Holm corrections for 9 tests. P-values significant before the multiple testing correction are indicated with “<sup>##</sup>”.

<sup>d</sup> Log10 transformation was performed for these test scores.

<sup>#</sup> Significant at <0.05 before Bonferroni Holm correction.

<sup>##</sup> Significant at <0.01 before Bonferroni Holm correction.

**Supplementary Table 15** | The Association between cognitive tests (Vocabulary, Reaction test, Stroop Box and Trail-making Numeric), age and Alzheimer’s disease polygenic risk groups (APOE region excluded).

| Phenotypes <sup>a</sup> | Age                    |                   | Age <sup>2</sup>       |                   | PRS (Low) <sup>b</sup> |                   | Age x PRS (Low)        |                   | Age <sup>2</sup> x PRS (Low) |                   |
|-------------------------|------------------------|-------------------|------------------------|-------------------|------------------------|-------------------|------------------------|-------------------|------------------------------|-------------------|
|                         | B<br>(SE) <sup>a</sup> | P <sup>a, c</sup> | B<br>(SE) <sup>a</sup> | P <sup>a, c</sup> | B<br>(SE) <sup>a</sup> | P <sup>a, c</sup> | B<br>(SE) <sup>a</sup> | P <sup>a, c</sup> | B<br>(SE) <sup>a</sup>       | P <sup>a, c</sup> |
| RT <sup>d</sup>         | 0.0028<br>(0.0002)     | <0.0001           | 0.00002<br>(0.00001)   | 0.08              | -0.001<br>(0.004)      | 1                 | 0.0001<br>(0.0002)     | 1                 | -0.000001<br>(0.00001)       | 0.92              |
| SB <sup>d</sup>         | 0.003<br>(0.0002)      | <0.0001           | 0.00004<br>(0.00001)   | 0.0013            | 0.003<br>(0.004)       | 1                 | 0.00005<br>(0.0002)    | 1                 | -0.00001<br>(0.00001)        | 0.86              |
| TMN <sup>d</sup>        | 0.006<br>(0.0004)      | <0.0001           | 0.0001<br>(0.00003)    | 0.0008            | 0.003<br>(0.008)       | 1                 | -0.0005<br>(0.0004)    | 1                 | -0.00004<br>(0.00003)        | 0.28              |
| VY                      | -0.05<br>(0.009)       | <0.0001           | -                      | -                 | -0.28<br>(0.14)        | 0.20              | -0.004<br>(0.01)       | 1                 | -                            | -                 |

<sup>a</sup> RT: Reaction Test; SB: Stroop Box; TMN: Trail Making Numeric; VY: Vocabulary; B: Beta value from linear mixed effect model; SE: Standard Error; P: two-tailed p-value; Associations were adjusted for sex, the first five genomic principal components, devices, batch, array (as random effect).

<sup>b</sup> High PRS group was used as reference.

<sup>c</sup> P-values are presented after Bonferroni–Holm corrections for 4 tests.

<sup>d</sup> Log10 transformation was performed for these test scores.

**Supplementary Table 16** | Heritability for cognitive tests and two summary measures of general cognitive ability (G4 and G6) in G&C cohort.

| Phenotypes                  | N      | Transformation | Heritability <sup>1</sup> |
|-----------------------------|--------|----------------|---------------------------|
| Reaction Test               | 10,005 | log10(RT)      | 0.11 (0.04)               |
| Stroop Box                  | 10,000 | log10(RT)      | 0.15 (0.04)               |
| Stroop Ink                  | 9,983  | log10(RT)      | 0.15 (0.04)               |
| Symbol Digits               | 9,921  | No             | 0.07 (0.04)               |
| Trail Making: Numeric       | 9,930  | log10(RT)      | 0.14 (0.04)               |
| Trail Making: Alpha Numeric | 9,930  | log10(RT)      | 0.21 (0.04)               |
| Matrix                      | 9,981  | No             | 0.17 (0.04)               |
| Working Memory              | 10,019 | log10(RT)      | 0.06 (0.04)               |
| Quiz                        | 10,022 | No             | 0.23 (0.04)               |
| Vocabulary                  | 9,971  | No             | 0.23 (0.04)               |
| Paring7                     | 10,013 | log10(RT)      | 0.14 (0.04)               |
| G6                          | 9,879  | No             | 0.19 (0.04)               |
| G4                          | 9,879  | No             | 0.28 (0.04)               |

<sup>1</sup> Heritability estimates are derived using individual level data.

**Supplementary Table 17** | Summary of covariates adjusted in the heritability and genome-wide association analysis.

| Phenotypes                         | Covariates Adjusted                                                                                                    |
|------------------------------------|------------------------------------------------------------------------------------------------------------------------|
| Reaction Test                      | Age, Age <sup>2</sup> , Sex, Age*Sex, Age <sup>2</sup> *Sex, Device used for cognitive test, Batch, Array, GPCs (1-20) |
| Stroop Box                         | Age, Age <sup>2</sup> , Sex, Age*Sex, Device used for cognitive test, Batch, Array, GPCs (1-20)                        |
| Stroop Ink                         | Age, Age <sup>2</sup> , Sex, Age*Sex, Device used for cognitive test, Batch, Array, GPCs (1-20)                        |
| Symbol Digits                      | Age, Age <sup>2</sup> , Sex, Age*Sex, Age <sup>2</sup> *Sex, Device used for cognitive test, Batch, Array, GPCs (1-20) |
| Trail Making: Numeric              | Age, Age <sup>2</sup> , Sex, Device used for cognitive test, Batch, Array, GPCs (1-20)                                 |
| Trail Making: Alpha Numeric Matrix | Age, Age <sup>2</sup> , Sex, Device used for cognitive test, Batch, Array, GPCs (1-20)                                 |
| Working Memory Quiz                | Age, Age <sup>2</sup> , Sex, Batch, Array, GPCs (1-20)                                                                 |
| Vocabulary                         | Age, Sex, Age*Sex, Device used for cognitive test, Batch, Array, GPCs (1-20)                                           |
| Paring7                            | Age, Sex, Device used for cognitive test, Batch, Array, GPCs (1-20)                                                    |
| G6                                 | Age, Age <sup>2</sup> , Sex, Device used for cognitive test, Batch, Array, GPCs (1-20)                                 |
| G4                                 | Age, Age <sup>2</sup> , Sex, Age*Sex, Device used for cognitive test, Batch, Array, GPCs (1-20)                        |

**Supplementary Table 18** | Independent SNPs significantly associated with G4 and G6 in Genes and Cognition cohort.

| Phenotypes | SNP        | CHR: BP     | A1 | A2 | FREQ  | BETA    | SE     | P       | INFO |
|------------|------------|-------------|----|----|-------|---------|--------|---------|------|
| G4         | rs62034351 | 16:28565489 | G  | A  | 0.648 | -0.1141 | 0.0199 | 9.1E-09 | 0.98 |
| G6         | rs11705789 | 3:81969196  | G  | T  | 0.641 | -0.1113 | 0.0203 | 4.5E-08 | 0.99 |

The independent SNPs at GWAS significant locus were reported with RSID; genomic coordinates (CHR: BP; GRCh37.p13/Hg19); A1, effect allele; A2, other allele; FREQ, effect allele frequency; Beta, coefficient from BOLT infinitesimal model; SE, standard error; P, two-tailed p-value; INFO, estimated imputation score.

**Supplementary Table 19** | G4 associated genome-wide significant SNP list.

| SNP        | CHR | BP       | A1 | A2 | FREQ     | INFO     | P        | BETA     | SE       |
|------------|-----|----------|----|----|----------|----------|----------|----------|----------|
| rs149299   | 16  | 28485141 | T  | C  | 0.610634 | 0.982413 | 9.50E-09 | -0.11175 | 0.019468 |
| rs151179   | 16  | 28487056 | A  | G  | 0.609943 | 0.982619 | 1.40E-08 | -0.11047 | 0.019464 |
| rs151180   | 16  | 28487213 | G  | T  | 0.587392 | 0.952882 | 2.80E-08 | -0.10897 | 0.019611 |
| rs181195   | 16  | 28488369 | A  | T  | 0.610613 | 0.982556 | 9.70E-09 | -0.11165 | 0.019466 |
| rs151181   | 16  | 28490517 | T  | C  | 0.605517 | 0.998356 | 1.30E-08 | -0.10947 | 0.019257 |
| rs151303   | 16  | 28492510 | C  | A  | 0.610498 | 0.984459 | 9.20E-09 | -0.1117  | 0.019444 |
| rs34838    | 16  | 28494350 | A  | G  | 0.572067 | 0.981827 | 4.80E-08 | -0.10483 | 0.019202 |
| rs42861    | 16  | 28494421 | A  | G  | 0.57205  | 0.981582 | 4.70E-08 | -0.10492 | 0.019203 |
| rs34836    | 16  | 28494823 | A  | G  | 0.571975 | 0.98181  | 4.60E-08 | -0.10498 | 0.019203 |
| rs151182   | 16  | 28495752 | C  | T  | 0.61014  | 0.983282 | 1.10E-08 | -0.11104 | 0.019453 |
| rs151301   | 16  | 28497059 | T  | A  | 0.61031  | 0.98362  | 9.40E-09 | -0.11169 | 0.019452 |
| rs34835    | 16  | 28499291 | A  | G  | 0.602986 | 0.982966 | 4.20E-08 | -0.1063  | 0.019395 |
| rs27741    | 16  | 28504181 | G  | A  | 0.6039   | 0.982207 | 3.20E-08 | -0.10732 | 0.019404 |
| rs149271   | 16  | 28506872 | A  | G  | 0.6102   | 0.982787 | 2.20E-08 | -0.10911 | 0.019494 |
| rs180743   | 16  | 28507644 | C  | G  | 0.610086 | 0.982701 | 1.50E-08 | -0.11034 | 0.019495 |
| rs180744   | 16  | 28508048 | A  | G  | 0.609811 | 0.982214 | 1.70E-08 | -0.10991 | 0.0195   |
| rs151174   | 16  | 28508069 | C  | T  | 0.610733 | 0.982393 | 1.20E-08 | -0.11113 | 0.019497 |
| rs240704   | 16  | 28529949 | T  | C  | 0.600502 | 0.983982 | 4.40E-08 | -0.10586 | 0.019344 |
| rs4787458  | 16  | 28531287 | A  | G  | 0.634545 | 0.984722 | 4.70E-08 | -0.10763 | 0.019709 |
| rs3785354  | 16  | 28550667 | C  | T  | 0.647662 | 0.983046 | 1.20E-08 | -0.11321 | 0.01986  |
| rs4787457  | 16  | 28555400 | A  | G  | 0.647685 | 0.983098 | 1.10E-08 | -0.11335 | 0.019861 |
| rs9926245  | 16  | 28555706 | T  | A  | 0.604767 | 0.985439 | 3.90E-08 | -0.10669 | 0.019407 |
| rs4788081  | 16  | 28556147 | T  | C  | 0.647769 | 0.983058 | 1.00E-08 | -0.11383 | 0.01986  |
| rs4788080  | 16  | 28558081 | C  | T  | 0.647682 | 0.98313  | 1.20E-08 | -0.11333 | 0.01986  |
| rs4788079  | 16  | 28559363 | C  | A  | 0.647763 | 0.983023 | 1.20E-08 | -0.11334 | 0.019861 |
| rs4787456  | 16  | 28559573 | C  | T  | 0.647792 | 0.982953 | 1.10E-08 | -0.11347 | 0.019863 |
| rs4788078  | 16  | 28559981 | G  | A  | 0.647773 | 0.983005 | 1.10E-08 | -0.11344 | 0.019863 |
| rs13331170 | 16  | 28561982 | T  | C  | 0.604795 | 0.985073 | 3.30E-08 | -0.10727 | 0.019414 |
| rs62034351 | 16  | 28565489 | G  | A  | 0.648    | 0.982706 | 9.10E-09 | -0.11413 | 0.019862 |
| rs7191618  | 16  | 28565667 | C  | G  | 0.604994 | 0.984285 | 3.40E-08 | -0.10725 | 0.019421 |
| rs7187604  | 16  | 28565953 | A  | G  | 0.647188 | 0.982929 | 1.50E-08 | -0.11231 | 0.019845 |
| rs3859172  | 16  | 28566158 | G  | T  | 0.604978 | 0.984441 | 3.40E-08 | -0.10723 | 0.019421 |
| rs4788076  | 16  | 28570005 | C  | T  | 0.647809 | 0.981725 | 1.70E-08 | -0.11205 | 0.01986  |
| rs56272201 | 16  | 28580685 | A  | G  | 0.648    | 0.98157  | 1.60E-08 | -0.11222 | 0.019864 |
| rs56396270 | 16  | 28580829 | C  | T  | 0.647897 | 0.981691 | 2.00E-08 | -0.1115  | 0.019863 |

|             |    |          |   |   |          |          |          |          |          |
|-------------|----|----------|---|---|----------|----------|----------|----------|----------|
| rs12447461  | 16 | 28582941 | C | A | 0.637043 | 0.982737 | 4.40E-08 | -0.10828 | 0.019784 |
| rs112191041 | 16 | 28583362 | A | G | 0.637077 | 0.982628 | 4.60E-08 | -0.10818 | 0.019785 |
| rs111693583 | 16 | 28583610 | C | T | 0.637079 | 0.982618 | 4.60E-08 | -0.10818 | 0.019785 |
| rs11074911  | 16 | 28583865 | C | T | 0.637079 | 0.982618 | 4.60E-08 | -0.10818 | 0.019785 |
| rs56209193  | 16 | 28585636 | C | T | 0.63708  | 0.982625 | 4.30E-08 | -0.10839 | 0.019785 |
| rs7193402   | 16 | 28586127 | T | C | 0.643778 | 0.998521 | 1.90E-08 | -0.11034 | 0.019641 |
| rs62034358  | 16 | 28587597 | G | T | 0.6479   | 0.981682 | 2.00E-08 | -0.11152 | 0.019863 |
| rs12445823  | 16 | 28588049 | A | C | 0.647897 | 0.981691 | 2.00E-08 | -0.1115  | 0.019863 |
| rs12445744  | 16 | 28588395 | A | C | 0.647896 | 0.981692 | 2.00E-08 | -0.1115  | 0.019863 |
| rs12448429  | 16 | 28588443 | C | T | 0.63704  | 0.982744 | 4.50E-08 | -0.10825 | 0.019784 |
| rs4787455   | 16 | 28589455 | G | A | 0.648117 | 0.980934 | 1.90E-08 | -0.11165 | 0.019876 |
| rs112047757 | 16 | 28590862 | C | T | 0.637151 | 0.982128 | 4.10E-08 | -0.1086  | 0.019789 |
| rs112831778 | 16 | 28590989 | C | T | 0.648175 | 0.980824 | 1.40E-08 | -0.11265 | 0.019873 |
| rs17707300  | 16 | 28593347 | T | C | 0.632803 | 0.999981 | 3.90E-08 | -0.10751 | 0.019562 |
| rs4788074   | 16 | 28593597 | G | A | 0.648062 | 0.980927 | 1.80E-08 | -0.11188 | 0.019873 |
| rs4788073   | 16 | 28594549 | A | G | 0.637096 | 0.982126 | 4.00E-08 | -0.10868 | 0.01979  |
| rs17640009  | 16 | 28595700 | A | G | 0.637107 | 0.982111 | 4.00E-08 | -0.1087  | 0.01979  |
| rs75539558  | 16 | 28595810 | C | G | 0.637112 | 0.98209  | 3.90E-08 | -0.10872 | 0.019791 |
| rs62034359  | 16 | 28600091 | C | T | 0.648447 | 0.979017 | 2.10E-08 | -0.11158 | 0.019905 |
| rs2077031   | 16 | 28603168 | T | A | 0.648442 | 0.978499 | 1.80E-08 | -0.11214 | 0.01991  |
| rs762634    | 16 | 28603335 | T | C | 0.648615 | 0.978091 | 1.80E-08 | -0.11209 | 0.019916 |
| rs710410    | 16 | 28603342 | A | G | 0.648414 | 0.977706 | 2.20E-08 | -0.11146 | 0.019922 |
| rs1059491   | 16 | 28603655 | T | G | 0.64839  | 0.978617 | 2.00E-08 | -0.11179 | 0.01991  |
| rs113208333 | 16 | 28606160 | G | T | 0.637488 | 0.97983  | 4.80E-08 | -0.10822 | 0.019822 |
| rs4115668   | 16 | 28607532 | G | A | 0.671833 | 0.953518 | 4.10E-08 | -0.11253 | 0.020507 |
| rs762633    | 16 | 28608341 | T | C | 0.649409 | 0.973221 | 3.80E-08 | -0.11001 | 0.019994 |
| rs35175818  | 16 | 28608746 | A | C | 0.649328 | 0.972972 | 3.80E-08 | -0.11003 | 0.019998 |
| rs4149398   | 16 | 28608938 | C | G | 0.649363 | 0.972747 | 3.60E-08 | -0.1102  | 0.020002 |
| rs2925635   | 16 | 28622993 | A | G | 0.396312 | 0.883702 | 3.90E-08 | 0.113497 | 0.020652 |
| rs28729187  | 16 | 28626966 | T | C | 0.372492 | 0.948165 | 1.20E-08 | 0.11349  | 0.019928 |
| rs28676837  | 16 | 28627063 | C | T | 0.372421 | 0.948147 | 1.30E-08 | 0.113317 | 0.019927 |
| rs6498089   | 16 | 28629300 | C | T | 0.372496 | 0.948211 | 1.20E-08 | 0.113483 | 0.019928 |
| rs28410083  | 16 | 28631360 | A | T | 0.367907 | 0.947687 | 3.80E-08 | 0.109762 | 0.01995  |
| rs1968751   | 16 | 28631759 | T | C | 0.367722 | 0.947943 | 3.70E-08 | 0.10981  | 0.019952 |
| rs8049739   | 16 | 28632288 | G | C | 0.367671 | 0.947411 | 3.50E-08 | 0.110068 | 0.019967 |
| rs12446008  | 16 | 28644459 | C | T | 0.727563 | 0.933254 | 1.20E-08 | -0.12521 | 0.021945 |
| rs9929198   | 16 | 28644980 | G | A | 0.726369 | 0.932275 | 1.50E-08 | -0.1243  | 0.021937 |
| rs111820348 | 16 | 28645127 | C | T | 0.729977 | 0.930013 | 1.70E-08 | -0.12441 | 0.022063 |
| rs3987654   | 16 | 28647568 | T | C | 0.72705  | 0.921541 | 1.20E-08 | -0.12584 | 0.022068 |

rs72793807 16 28651732 C T 0.728273 0.921134 1.10E-08 -0.1262 0.022105

SNP: Single Nucleotide Polymorphism; CHR: Chromosome; A1, Effect allele; A2, Other allele; FREQ: Effect allele frequency; Beta: linear regression coefficient; SE: standard error; INFO: Estimated imputation score.

**Supplementary Table 20** | G4 associated SNPs at the suggestive threshold of significance ( $1 \times 10^{-6}$ ).

| SNP         | CHR | BP       | A1 | A2 | FREQ     | INFO     | P        | BETA     | SE       |
|-------------|-----|----------|----|----|----------|----------|----------|----------|----------|
| rs864686    | 5   | 32498562 | A  | T  | 0.622323 | 0.975189 | 9.40E-08 | -0.10461 | 0.019597 |
| rs9376020   | 6   | 1.35E+08 | C  | A  | 0.775149 | 0.861135 | 7.80E-07 | -0.12089 | 0.024473 |
| rs6913681   | 6   | 1.35E+08 | C  | A  | 0.774394 | 0.849165 | 3.70E-07 | -0.12536 | 0.024665 |
| rs6490577   | 13  | 21012107 | T  | C  | 0.328958 | 0.999218 | 6.60E-07 | 0.098703 | 0.019853 |
| rs34720574  | 13  | 21012549 | C  | T  | 0.673167 | 0.991886 | 6.90E-07 | -0.0991  | 0.019961 |
| rs6490578   | 13  | 21012811 | T  | C  | 0.332455 | 0.983647 | 8.90E-07 | 0.098114 | 0.019961 |
| rs4773767   | 13  | 94571840 | C  | T  | 0.693269 | 0.974839 | 4.30E-07 | -0.10389 | 0.020543 |
| rs928187    | 13  | 94573380 | G  | T  | 0.692973 | 0.975079 | 4.00E-07 | -0.10411 | 0.020535 |
| rs928186    | 13  | 94573671 | C  | T  | 0.692867 | 0.975161 | 4.70E-07 | -0.10339 | 0.020523 |
| rs17174742  | 13  | 94574965 | T  | C  | 0.692742 | 0.975153 | 4.70E-07 | -0.10342 | 0.02052  |
| rs6492682   | 13  | 94576572 | G  | C  | 0.311995 | 0.951049 | 9.30E-07 | 0.101517 | 0.020695 |
| rs9561473   | 13  | 94582160 | T  | G  | 0.692573 | 0.975374 | 4.70E-07 | -0.10336 | 0.020516 |
| rs9561477   | 13  | 94584521 | A  | C  | 0.691027 | 0.987405 | 3.50E-07 | -0.10364 | 0.020343 |
| rs2389077   | 13  | 94585426 | G  | A  | 0.698482 | 0.985949 | 7.10E-07 | -0.10148 | 0.020466 |
| rs9556341   | 13  | 94587427 | G  | A  | 0.691363 | 0.987258 | 4.10E-07 | -0.10312 | 0.020354 |
| rs945936    | 13  | 94587909 | G  | A  | 0.654839 | 0.987428 | 7.90E-07 | -0.09788 | 0.019817 |
| rs1888229   | 13  | 94588358 | A  | G  | 0.691171 | 0.987682 | 3.60E-07 | -0.10345 | 0.020336 |
| rs878765    | 13  | 94589164 | A  | G  | 0.691152 | 0.987753 | 3.70E-07 | -0.10341 | 0.020334 |
| rs9524281   | 13  | 94591226 | G  | T  | 0.316584 | 0.964171 | 5.40E-07 | 0.102544 | 0.020463 |
| rs7332610   | 13  | 94592768 | T  | G  | 0.653819 | 0.988008 | 9.00E-07 | -0.09731 | 0.01981  |
| rs73541965  | 13  | 94594671 | T  | C  | 0.653772 | 0.987988 | 8.90E-07 | -0.09732 | 0.019807 |
| rs11619935  | 13  | 94595305 | T  | C  | 0.651069 | 0.999293 | 7.90E-07 | -0.09706 | 0.019661 |
| rs1591697   | 13  | 94610986 | C  | T  | 0.311335 | 0.968706 | 6.30E-07 | 0.102384 | 0.020557 |
| rs1337828   | 13  | 94612361 | C  | T  | 0.304236 | 0.999821 | 6.70E-07 | 0.101164 | 0.020351 |
| rs9524296   | 13  | 94629619 | T  | C  | 0.310196 | 0.968209 | 5.30E-07 | 0.10323  | 0.020584 |
| rs2726034   | 16  | 28336882 | T  | C  | 0.684117 | 0.968008 | 7.90E-07 | -0.10184 | 0.020625 |
| rs12598357  | 16  | 28340945 | A  | G  | 0.59892  | 0.95717  | 5.40E-07 | -0.09802 | 0.01956  |
| rs2726036   | 16  | 28347140 | A  | C  | 0.618688 | 0.957724 | 8.60E-07 | -0.09724 | 0.019763 |
| rs140512382 | 16  | 28350730 | G  | A  | 0.803732 | 0.716586 | 2.60E-07 | -0.14816 | 0.028782 |
| rs62032566  | 16  | 28383243 | C  | T  | 0.605425 | 0.948532 | 8.70E-07 | -0.09748 | 0.019813 |
| rs149299    | 16  | 28485141 | T  | C  | 0.610634 | 0.982413 | 9.50E-09 | -0.11175 | 0.019468 |
| rs151179    | 16  | 28487056 | A  | G  | 0.609943 | 0.982619 | 1.40E-08 | -0.11047 | 0.019464 |

|            |    |          |   |   |          |          |          |          |          |
|------------|----|----------|---|---|----------|----------|----------|----------|----------|
| rs151180   | 16 | 28487213 | G | T | 0.587392 | 0.952882 | 2.80E-08 | -0.10897 | 0.019611 |
| rs181195   | 16 | 28488369 | A | T | 0.610613 | 0.982556 | 9.70E-09 | -0.11165 | 0.019466 |
| rs34839    | 16 | 28489346 | T | C | 0.57279  | 0.981387 | 5.00E-08 | -0.10474 | 0.019213 |
| rs151181   | 16 | 28490517 | T | C | 0.605517 | 0.998356 | 1.30E-08 | -0.10947 | 0.019257 |
| rs151303   | 16 | 28492510 | C | A | 0.610498 | 0.984459 | 9.20E-09 | -0.1117  | 0.019444 |
| rs34838    | 16 | 28494350 | A | G | 0.572067 | 0.981827 | 4.80E-08 | -0.10483 | 0.019202 |
| rs42861    | 16 | 28494421 | A | G | 0.57205  | 0.981582 | 4.70E-08 | -0.10492 | 0.019203 |
| rs34836    | 16 | 28494823 | A | G | 0.571975 | 0.98181  | 4.60E-08 | -0.10498 | 0.019203 |
| rs151182   | 16 | 28495752 | C | T | 0.61014  | 0.983282 | 1.10E-08 | -0.11104 | 0.019453 |
| rs151301   | 16 | 28497059 | T | A | 0.61031  | 0.98362  | 9.40E-09 | -0.11169 | 0.019452 |
| rs34835    | 16 | 28499291 | A | G | 0.602986 | 0.982966 | 4.20E-08 | -0.1063  | 0.019395 |
| rs27741    | 16 | 28504181 | G | A | 0.6039   | 0.982207 | 3.20E-08 | -0.10732 | 0.019404 |
| rs149271   | 16 | 28506872 | A | G | 0.6102   | 0.982787 | 2.20E-08 | -0.10911 | 0.019494 |
| rs180743   | 16 | 28507644 | C | G | 0.610086 | 0.982701 | 1.50E-08 | -0.11034 | 0.019495 |
| rs180744   | 16 | 28508048 | A | G | 0.609811 | 0.982214 | 1.70E-08 | -0.10991 | 0.0195   |
| rs151174   | 16 | 28508069 | C | T | 0.610733 | 0.982393 | 1.20E-08 | -0.11113 | 0.019497 |
| rs40831    | 16 | 28508447 | A | G | 0.592101 | 0.973879 | 7.00E-08 | -0.10444 | 0.019371 |
| rs40834    | 16 | 28510393 | C | T | 0.555908 | 0.982859 | 2.70E-07 | -0.09834 | 0.019115 |
| rs40836    | 16 | 28510537 | A | G | 0.555693 | 0.98374  | 2.40E-07 | -0.0987  | 0.019105 |
| rs40837    | 16 | 28510845 | A | G | 0.555832 | 0.983885 | 2.50E-07 | -0.09848 | 0.0191   |
| rs181203   | 16 | 28512371 | A | C | 0.679905 | 0.976844 | 5.00E-08 | -0.11187 | 0.020523 |
| rs181205   | 16 | 28513129 | T | C | 0.668011 | 0.957617 | 2.20E-07 | -0.10653 | 0.020545 |
| rs181206   | 16 | 28513403 | A | G | 0.681938 | 0.974675 | 6.60E-08 | -0.11123 | 0.020586 |
| rs181209   | 16 | 28514854 | G | T | 0.680243 | 0.978748 | 5.60E-08 | -0.11143 | 0.020512 |
| rs26528    | 16 | 28517709 | T | C | 0.552044 | 0.999696 | 2.80E-07 | -0.09725 | 0.018934 |
| rs153109   | 16 | 28519096 | T | C | 0.55578  | 0.985117 | 2.80E-07 | -0.09802 | 0.019091 |
| rs56354901 | 16 | 28523144 | T | C | 0.675396 | 0.984719 | 2.80E-07 | -0.10439 | 0.020328 |
| rs240707   | 16 | 28524612 | C | G | 0.555267 | 0.984678 | 3.70E-07 | -0.09706 | 0.019093 |
| rs153106   | 16 | 28526897 | T | C | 0.600995 | 0.985513 | 6.10E-08 | -0.10481 | 0.019355 |
| rs62034318 | 16 | 28527221 | C | T | 0.674715 | 0.984879 | 3.40E-07 | -0.10365 | 0.020318 |
| rs79046494 | 16 | 28527326 | G | A | 0.674715 | 0.984879 | 3.40E-07 | -0.10365 | 0.020318 |
| rs28449958 | 16 | 28528781 | G | A | 0.673306 | 0.981393 | 2.90E-07 | -0.10431 | 0.020324 |
| rs240705   | 16 | 28529716 | C | T | 0.600989 | 0.985497 | 6.20E-08 | -0.10479 | 0.019355 |
| rs240704   | 16 | 28529949 | T | C | 0.600502 | 0.983982 | 4.40E-08 | -0.10586 | 0.019344 |
| rs4787458  | 16 | 28531287 | A | G | 0.634545 | 0.984722 | 4.70E-08 | -0.10763 | 0.019709 |
| rs240702   | 16 | 28531353 | C | T | 0.601383 | 0.985159 | 7.50E-08 | -0.10413 | 0.01936  |
| rs62034319 | 16 | 28532188 | T | G | 0.601645 | 0.984553 | 6.10E-08 | -0.10486 | 0.019364 |
| rs28698667 | 16 | 28533071 | C | T | 0.602295 | 0.985357 | 7.20E-08 | -0.10429 | 0.019367 |
| rs62034321 | 16 | 28534038 | C | T | 0.602339 | 0.985625 | 8.00E-08 | -0.10395 | 0.019369 |

|             |    |          |   |   |          |          |          |          |          |
|-------------|----|----------|---|---|----------|----------|----------|----------|----------|
| rs4788085   | 16 | 28535003 | A | G | 0.602247 | 0.985596 | 7.40E-08 | -0.10422 | 0.019371 |
| rs28772958  | 16 | 28535305 | A | G | 0.60225  | 0.985582 | 7.40E-08 | -0.10423 | 0.019371 |
| rs62034322  | 16 | 28535834 | G | A | 0.634009 | 0.985135 | 6.20E-08 | -0.10671 | 0.019719 |
| rs62034323  | 16 | 28536473 | C | T | 0.602338 | 0.985641 | 8.10E-08 | -0.10391 | 0.019368 |
| rs2106480   | 16 | 28537971 | T | C | 0.602232 | 0.985565 | 7.50E-08 | -0.1042  | 0.019371 |
| rs62034325  | 16 | 28538640 | A | G | 0.63463  | 0.985241 | 5.70E-08 | -0.10708 | 0.019723 |
| rs4788084   | 16 | 28539848 | C | T | 0.598895 | 0.999943 | 8.10E-08 | -0.10301 | 0.0192   |
| rs12446550  | 16 | 28543381 | G | A | 0.60238  | 0.985869 | 8.30E-08 | -0.1038  | 0.019366 |
| rs4788083   | 16 | 28545449 | A | G | 0.602226 | 0.985806 | 8.20E-08 | -0.10388 | 0.019369 |
| rs3785354   | 16 | 28550667 | C | T | 0.647662 | 0.983046 | 1.20E-08 | -0.11321 | 0.01986  |
| rs4787457   | 16 | 28555400 | A | G | 0.647685 | 0.983098 | 1.10E-08 | -0.11335 | 0.019861 |
| rs9926245   | 16 | 28555706 | T | A | 0.604767 | 0.985439 | 3.90E-08 | -0.10669 | 0.019407 |
| rs4788081   | 16 | 28556147 | T | C | 0.647769 | 0.983058 | 1.00E-08 | -0.11383 | 0.01986  |
| rs4788080   | 16 | 28558081 | C | T | 0.647682 | 0.98313  | 1.20E-08 | -0.11333 | 0.01986  |
| rs4788079   | 16 | 28559363 | C | A | 0.647763 | 0.983023 | 1.20E-08 | -0.11334 | 0.019861 |
| rs4787456   | 16 | 28559573 | C | T | 0.647792 | 0.982953 | 1.10E-08 | -0.11347 | 0.019863 |
| rs4788078   | 16 | 28559981 | G | A | 0.647773 | 0.983005 | 1.10E-08 | -0.11344 | 0.019863 |
| rs13331170  | 16 | 28561982 | T | C | 0.604795 | 0.985073 | 3.30E-08 | -0.10727 | 0.019414 |
| rs62034351  | 16 | 28565489 | G | A | 0.648    | 0.982706 | 9.10E-09 | -0.11413 | 0.019862 |
| rs7191618   | 16 | 28565667 | C | G | 0.604994 | 0.984285 | 3.40E-08 | -0.10725 | 0.019421 |
| rs7187604   | 16 | 28565953 | A | G | 0.647188 | 0.982929 | 1.50E-08 | -0.11231 | 0.019845 |
| rs3859172   | 16 | 28566158 | G | T | 0.604978 | 0.984441 | 3.40E-08 | -0.10723 | 0.019421 |
| rs4788076   | 16 | 28570005 | C | T | 0.647809 | 0.981725 | 1.70E-08 | -0.11205 | 0.01986  |
| rs56272201  | 16 | 28580685 | A | G | 0.648    | 0.98157  | 1.60E-08 | -0.11222 | 0.019864 |
| rs56396270  | 16 | 28580829 | C | T | 0.647897 | 0.981691 | 2.00E-08 | -0.1115  | 0.019863 |
| rs12447461  | 16 | 28582941 | C | A | 0.637043 | 0.982737 | 4.40E-08 | -0.10828 | 0.019784 |
| rs112191041 | 16 | 28583362 | A | G | 0.637077 | 0.982628 | 4.60E-08 | -0.10818 | 0.019785 |
| rs111693583 | 16 | 28583610 | C | T | 0.637079 | 0.982618 | 4.60E-08 | -0.10818 | 0.019785 |
| rs11074911  | 16 | 28583865 | C | T | 0.637079 | 0.982618 | 4.60E-08 | -0.10818 | 0.019785 |
| rs56209193  | 16 | 28585636 | C | T | 0.63708  | 0.982625 | 4.30E-08 | -0.10839 | 0.019785 |
| rs7193402   | 16 | 28586127 | T | C | 0.643778 | 0.998521 | 1.90E-08 | -0.11034 | 0.019641 |
| rs62034358  | 16 | 28587597 | G | T | 0.6479   | 0.981682 | 2.00E-08 | -0.11152 | 0.019863 |
| rs12445823  | 16 | 28588049 | A | C | 0.647897 | 0.981691 | 2.00E-08 | -0.1115  | 0.019863 |
| rs12445744  | 16 | 28588395 | A | C | 0.647896 | 0.981692 | 2.00E-08 | -0.1115  | 0.019863 |
| rs12448429  | 16 | 28588443 | C | T | 0.63704  | 0.982744 | 4.50E-08 | -0.10825 | 0.019784 |
| rs4787455   | 16 | 28589455 | G | A | 0.648117 | 0.980934 | 1.90E-08 | -0.11165 | 0.019876 |
| rs112047757 | 16 | 28590862 | C | T | 0.637151 | 0.982128 | 4.10E-08 | -0.1086  | 0.019789 |
| rs112831778 | 16 | 28590989 | C | T | 0.648175 | 0.980824 | 1.40E-08 | -0.11265 | 0.019873 |
| rs17707300  | 16 | 28593347 | T | C | 0.632803 | 0.999981 | 3.90E-08 | -0.10751 | 0.019562 |



|             |    |          |   |   |          |          |          |          |          |
|-------------|----|----------|---|---|----------|----------|----------|----------|----------|
| rs4788074   | 16 | 28593597 | G | A | 0.648062 | 0.980927 | 1.80E-08 | -0.11188 | 0.019873 |
| rs4788073   | 16 | 28594549 | A | G | 0.637096 | 0.982126 | 4.00E-08 | -0.10868 | 0.01979  |
| rs17640009  | 16 | 28595700 | A | G | 0.637107 | 0.982111 | 4.00E-08 | -0.1087  | 0.01979  |
| rs75539558  | 16 | 28595810 | C | G | 0.637112 | 0.98209  | 3.90E-08 | -0.10872 | 0.019791 |
| rs55792032  | 16 | 28599411 | A | G | 0.637323 | 0.980279 | 5.00E-08 | -0.10805 | 0.019816 |
| rs62034359  | 16 | 28600091 | C | T | 0.648447 | 0.979017 | 2.10E-08 | -0.11158 | 0.019905 |
| rs2077031   | 16 | 28603168 | T | A | 0.648442 | 0.978499 | 1.80E-08 | -0.11214 | 0.01991  |
| rs762634    | 16 | 28603335 | T | C | 0.648615 | 0.978091 | 1.80E-08 | -0.11209 | 0.019916 |
| rs710410    | 16 | 28603342 | A | G | 0.648414 | 0.977706 | 2.20E-08 | -0.11146 | 0.019922 |
| rs1059491   | 16 | 28603655 | T | G | 0.64839  | 0.978617 | 2.00E-08 | -0.11179 | 0.01991  |
| rs113208333 | 16 | 28606160 | G | T | 0.637488 | 0.97983  | 4.80E-08 | -0.10822 | 0.019822 |
| rs4149406   | 16 | 28607070 | A | G | 0.638314 | 0.973757 | 6.90E-08 | -0.10735 | 0.019904 |
| rs4115668   | 16 | 28607532 | G | A | 0.671833 | 0.953518 | 4.10E-08 | -0.11253 | 0.020507 |
| rs743590    | 16 | 28608230 | G | A | 0.638415 | 0.97399  | 7.60E-08 | -0.10701 | 0.019903 |
| rs762633    | 16 | 28608341 | T | C | 0.649409 | 0.973221 | 3.80E-08 | -0.11001 | 0.019994 |
| rs35175818  | 16 | 28608746 | A | C | 0.649328 | 0.972972 | 3.80E-08 | -0.11003 | 0.019998 |
| rs4149398   | 16 | 28608938 | C | G | 0.649363 | 0.972747 | 3.60E-08 | -0.1102  | 0.020002 |
| rs62031562  | 16 | 28609329 | A | T | 0.644192 | 0.963439 | 1.30E-07 | -0.106   | 0.020063 |
| rs11074907  | 16 | 28613965 | A | G | 0.629262 | 0.941346 | 5.30E-07 | -0.10111 | 0.020168 |
| rs7191548   | 16 | 28614734 | T | C | 0.628302 | 0.942454 | 4.20E-07 | -0.10201 | 0.020157 |
| rs6498091   | 16 | 28616259 | T | G | 0.627929 | 0.942687 | 3.70E-07 | -0.10247 | 0.020152 |
| rs4788070   | 16 | 28616399 | G | A | 0.628131 | 0.942629 | 4.90E-07 | -0.10141 | 0.020156 |
| rs4788069   | 16 | 28616665 | C | A | 0.628958 | 0.941627 | 4.80E-07 | -0.10149 | 0.020168 |
| rs4788068   | 16 | 28616723 | C | T | 0.62901  | 0.94143  | 5.10E-07 | -0.10136 | 0.020176 |
| rs1042157   | 16 | 28617057 | G | A | 0.629009 | 0.941491 | 5.10E-07 | -0.1013  | 0.020174 |
| rs1042028   | 16 | 28617514 | C | T | 0.677634 | 0.933892 | 9.10E-07 | -0.10237 | 0.020852 |
| rs4149394   | 16 | 28617574 | C | T | 0.631721 | 0.937004 | 3.20E-07 | -0.10343 | 0.020235 |
| rs79039694  | 16 | 28617795 | G | A | 0.631223 | 0.937028 | 5.20E-07 | -0.10168 | 0.020252 |
| rs4149392   | 16 | 28617813 | A | G | 0.631563 | 0.936497 | 5.70E-07 | -0.1013  | 0.020259 |
| rs75301646  | 16 | 28617885 | G | A | 0.647444 | 0.914893 | 9.60E-07 | -0.10138 | 0.020692 |
| rs116840534 | 16 | 28617890 | A | G | 0.647752 | 0.915012 | 7.00E-07 | -0.10259 | 0.020683 |
| rs41278158  | 16 | 28617993 | C | A | 0.771106 | 0.759051 | 6.00E-08 | -0.14271 | 0.026341 |
| rs74752114  | 16 | 28618068 | G | A | 0.741344 | 0.793659 | 2.90E-07 | -0.1258  | 0.024509 |
| rs9282862   | 16 | 28618237 | T | C | 0.629178 | 0.94049  | 4.90E-07 | -0.10148 | 0.02018  |
| rs3020804   | 16 | 28618636 | A | G | 0.628802 | 0.940673 | 4.90E-07 | -0.10154 | 0.02018  |
| rs3020803   | 16 | 28618914 | T | A | 0.629437 | 0.940927 | 3.70E-07 | -0.10259 | 0.020179 |
| rs2925629   | 16 | 28619076 | T | C | 0.629315 | 0.940823 | 3.30E-07 | -0.10304 | 0.02018  |
| rs2925630   | 16 | 28619132 | T | C | 0.629388 | 0.940833 | 3.10E-07 | -0.10319 | 0.020177 |
| rs1126447   | 16 | 28619911 | T | C | 0.628982 | 0.940799 | 4.20E-07 | -0.10208 | 0.020182 |

|             |    |          |   |   |          |          |          |          |          |
|-------------|----|----------|---|---|----------|----------|----------|----------|----------|
| rs9922110   | 16 | 28622154 | C | G | 0.600738 | 0.859984 | 5.70E-07 | 0.105222 | 0.021035 |
| rs2925635   | 16 | 28622993 | A | G | 0.396312 | 0.883702 | 3.90E-08 | 0.113497 | 0.020652 |
| rs28729187  | 16 | 28626966 | T | C | 0.372492 | 0.948165 | 1.20E-08 | 0.11349  | 0.019928 |
| rs28676837  | 16 | 28627063 | C | T | 0.372421 | 0.948147 | 1.30E-08 | 0.113317 | 0.019927 |
| rs6498089   | 16 | 28629300 | C | T | 0.372496 | 0.948211 | 1.20E-08 | 0.113483 | 0.019928 |
| rs28410083  | 16 | 28631360 | A | T | 0.367907 | 0.947687 | 3.80E-08 | 0.109762 | 0.01995  |
| rs62031607  | 16 | 28631530 | A | T | 0.649717 | 0.975208 | 5.20E-08 | -0.10826 | 0.019889 |
| rs1968752   | 16 | 28631585 | T | G | 0.355565 | 0.996915 | 6.80E-08 | 0.105811 | 0.019606 |
| rs1968751   | 16 | 28631759 | T | C | 0.367722 | 0.947943 | 3.70E-08 | 0.10981  | 0.019952 |
| rs2411453   | 16 | 28632021 | T | G | 0.397937 | 0.947108 | 1.20E-07 | 0.104539 | 0.019751 |
| rs8049739   | 16 | 28632288 | G | C | 0.367671 | 0.947411 | 3.50E-08 | 0.110068 | 0.019967 |
| rs12446008  | 16 | 28644459 | C | T | 0.727563 | 0.933254 | 1.20E-08 | -0.12521 | 0.021945 |
| rs9929198   | 16 | 28644980 | G | A | 0.726369 | 0.932275 | 1.50E-08 | -0.1243  | 0.021937 |
| rs111820348 | 16 | 28645127 | C | T | 0.729977 | 0.930013 | 1.70E-08 | -0.12441 | 0.022063 |
| rs3987654   | 16 | 28647568 | T | C | 0.72705  | 0.921541 | 1.20E-08 | -0.12584 | 0.022068 |
| rs35626515  | 16 | 28649651 | C | A | 0.614044 | 0.969915 | 5.90E-08 | -0.10643 | 0.019633 |
| rs72793807  | 16 | 28651732 | C | T | 0.728273 | 0.921134 | 1.10E-08 | -0.1262  | 0.022105 |
| rs188237080 | 16 | 28718755 | A | G | 0.673244 | 0.878849 | 1.50E-07 | -0.11295 | 0.021486 |
| rs378421    | 16 | 28754684 | G | A | 0.603625 | 0.966571 | 1.50E-07 | -0.10276 | 0.019575 |
| rs62036613  | 16 | 28823097 | A | G | 0.618028 | 0.983224 | 5.80E-07 | -0.09772 | 0.019552 |
| rs62036614  | 16 | 28824685 | T | C | 0.614185 | 0.99997  | 5.40E-07 | -0.09695 | 0.019346 |
| rs113029997 | 16 | 28825100 | T | C | 0.617078 | 0.984578 | 8.40E-07 | -0.09621 | 0.019532 |
| rs11860513  | 16 | 28825420 | C | T | 0.617078 | 0.984578 | 8.40E-07 | -0.09621 | 0.019532 |
| rs2008514   | 16 | 28825605 | G | A | 0.617078 | 0.984578 | 8.40E-07 | -0.09621 | 0.019532 |
| rs1987472   | 16 | 28825777 | C | T | 0.617078 | 0.984578 | 8.40E-07 | -0.09621 | 0.019532 |
| rs56186137  | 16 | 28825953 | A | G | 0.617108 | 0.984517 | 8.40E-07 | -0.09621 | 0.019534 |
| rs62036616  | 16 | 28826307 | A | G | 0.617941 | 0.984587 | 5.30E-07 | -0.09796 | 0.019534 |
| rs62036617  | 16 | 28827498 | T | C | 0.61713  | 0.984579 | 7.70E-07 | -0.09652 | 0.019531 |
| rs62036618  | 16 | 28828834 | A | C | 0.616861 | 0.985663 | 6.80E-07 | -0.09697 | 0.019521 |
| rs4788095   | 16 | 28831359 | T | C | 0.616865 | 0.985677 | 6.80E-07 | -0.09696 | 0.019521 |
| rs72793809  | 16 | 28832382 | C | T | 0.613378 | 0.999975 | 6.90E-07 | -0.09605 | 0.019347 |
| rs62036620  | 16 | 28833097 | A | G | 0.616859 | 0.9857   | 6.80E-07 | -0.09696 | 0.019521 |
| rs62036621  | 16 | 28833299 | C | A | 0.616859 | 0.9857   | 6.80E-07 | -0.09696 | 0.019521 |
| rs4451951   | 16 | 28836205 | T | C | 0.616746 | 0.985681 | 6.70E-07 | -0.09702 | 0.019523 |
| rs62036622  | 16 | 28837203 | T | G | 0.617428 | 0.985577 | 4.90E-07 | -0.09821 | 0.019525 |
| rs8049439   | 16 | 28837515 | T | C | 0.612652 | 0.99995  | 4.40E-07 | -0.09772 | 0.019348 |
| rs8062405   | 16 | 28837906 | A | G | 0.616362 | 0.99992  | 5.80E-07 | -0.09681 | 0.019372 |
| rs72793811  | 16 | 28839392 | G | A | 0.620567 | 0.985917 | 4.90E-07 | -0.09835 | 0.019552 |
| rs78613234  | 16 | 28839425 | T | C | 0.619763 | 0.985928 | 7.10E-07 | -0.09691 | 0.019548 |

|             |    |          |   |   |          |          |          |          |          |
|-------------|----|----------|---|---|----------|----------|----------|----------|----------|
| rs62036623  | 16 | 28839735 | C | G | 0.620563 | 0.985919 | 4.90E-07 | -0.09834 | 0.019552 |
| rs62036624  | 16 | 28839930 | G | T | 0.619719 | 0.985894 | 6.80E-07 | -0.09709 | 0.019545 |
| rs72793812  | 16 | 28840381 | A | G | 0.617556 | 0.985534 | 4.70E-07 | -0.09835 | 0.019528 |
| rs12443881  | 16 | 28841777 | C | T | 0.617215 | 0.999986 | 4.80E-07 | -0.09758 | 0.019379 |
| rs55991577  | 16 | 28843025 | C | T | 0.619876 | 0.985917 | 7.20E-07 | -0.09691 | 0.01955  |
| rs56358680  | 16 | 28843118 | A | G | 0.619872 | 0.985911 | 7.20E-07 | -0.09691 | 0.01955  |
| rs62036626  | 16 | 28844284 | A | G | 0.619879 | 0.985911 | 7.20E-07 | -0.09691 | 0.01955  |
| rs62036657  | 16 | 28844365 | G | A | 0.619879 | 0.985911 | 7.20E-07 | -0.09691 | 0.01955  |
| rs12444171  | 16 | 28845251 | G | A | 0.619889 | 0.985864 | 7.20E-07 | -0.09691 | 0.019551 |
| rs56404918  | 16 | 28846840 | T | G | 0.619892 | 0.985845 | 7.20E-07 | -0.09691 | 0.019551 |
| rs55719896  | 16 | 28846866 | G | A | 0.619906 | 0.985802 | 7.10E-07 | -0.09693 | 0.019552 |
| rs55830740  | 16 | 28847149 | G | C | 0.61989  | 0.985867 | 7.20E-07 | -0.0969  | 0.019551 |
| rs12928404  | 16 | 28847246 | T | C | 0.611397 | 0.983695 | 3.40E-07 | -0.09932 | 0.019481 |
| rs12325113  | 16 | 28848668 | T | C | 0.620687 | 0.985905 | 4.90E-07 | -0.09835 | 0.019554 |
| rs12325278  | 16 | 28848818 | A | G | 0.61996  | 0.985587 | 6.80E-07 | -0.0971  | 0.019554 |
| rs62036658  | 16 | 28850371 | T | G | 0.616072 | 0.983867 | 3.00E-07 | -0.10005 | 0.019532 |
| rs3088215   | 16 | 28853996 | A | C | 0.616459 | 0.999999 | 7.30E-07 | -0.09599 | 0.019378 |
| rs28403629  | 16 | 28854769 | A | G | 0.619826 | 0.986143 | 6.90E-07 | -0.09703 | 0.019548 |
| rs61737565  | 16 | 28855522 | G | C | 0.619826 | 0.986143 | 6.90E-07 | -0.09703 | 0.019548 |
| rs4788099   | 16 | 28855727 | A | G | 0.619826 | 0.986143 | 6.90E-07 | -0.09703 | 0.019548 |
| rs7187776   | 16 | 28857645 | A | G | 0.616247 | 0.986017 | 4.00E-07 | -0.09895 | 0.019524 |
| rs9972693   | 16 | 28859802 | A | G | 0.619858 | 0.986075 | 6.40E-07 | -0.09733 | 0.019548 |
| rs113079736 | 16 | 28860183 | G | A | 0.619181 | 0.985392 | 8.50E-07 | -0.09619 | 0.01954  |
| rs12325014  | 16 | 28860237 | C | G | 0.619548 | 0.985883 | 6.60E-07 | -0.09713 | 0.019538 |
| rs9972768   | 16 | 28861734 | A | C | 0.619858 | 0.986075 | 6.40E-07 | -0.09733 | 0.019548 |
| rs56040780  | 16 | 28861881 | C | T | 0.619854 | 0.986051 | 6.50E-07 | -0.09727 | 0.019548 |
| rs72793815  | 16 | 28863451 | G | A | 0.619887 | 0.986105 | 5.90E-07 | -0.09762 | 0.019547 |
| rs4788100   | 16 | 28864673 | T | C | 0.619885 | 0.986112 | 5.90E-07 | -0.09761 | 0.019547 |
| rs62037363  | 16 | 28865042 | T | C | 0.616512 | 0.999987 | 6.20E-07 | -0.0966  | 0.019378 |
| rs7205323   | 16 | 28865892 | C | T | 0.619916 | 0.985995 | 5.90E-07 | -0.09766 | 0.019548 |
| rs7187333   | 16 | 28865916 | G | A | 0.620767 | 0.985873 | 3.90E-07 | -0.09921 | 0.019553 |
| rs4788101   | 16 | 28867804 | C | T | 0.61651  | 0.999999 | 6.20E-07 | -0.0966  | 0.019377 |
| rs62037364  | 16 | 28868695 | G | A | 0.615134 | 0.980701 | 7.50E-07 | -0.09697 | 0.019593 |
| rs62037365  | 16 | 28868962 | C | G | 0.620334 | 0.984683 | 5.60E-07 | -0.0979  | 0.019565 |
| rs11150609  | 16 | 28870596 | A | G | 0.619867 | 0.986193 | 5.90E-07 | -0.09763 | 0.019546 |
| rs12446589  | 16 | 28870962 | G | A | 0.620646 | 0.986127 | 4.10E-07 | -0.09905 | 0.019551 |
| rs12448902  | 16 | 28871191 | G | A | 0.622659 | 0.982461 | 2.00E-07 | -0.10195 | 0.019609 |
| rs62037366  | 16 | 28871657 | C | A | 0.620668 | 0.986188 | 4.00E-07 | -0.09909 | 0.01955  |
| rs11859512  | 16 | 28871853 | C | T | 0.619874 | 0.986165 | 5.90E-07 | -0.09761 | 0.019547 |

|            |    |          |   |   |          |          |          |          |          |
|------------|----|----------|---|---|----------|----------|----------|----------|----------|
| rs11861132 | 16 | 28871860 | A | G | 0.619867 | 0.986193 | 5.90E-07 | -0.09763 | 0.019546 |
| rs11861174 | 16 | 28871989 | A | G | 0.619867 | 0.986193 | 5.90E-07 | -0.09763 | 0.019546 |
| rs7499337  | 16 | 28872354 | G | C | 0.620673 | 0.986196 | 4.00E-07 | -0.09908 | 0.019555 |
| rs6565229  | 16 | 28872598 | T | C | 0.619861 | 0.986217 | 5.90E-07 | -0.09764 | 0.019546 |
| rs4788102  | 16 | 28873398 | G | A | 0.61651  | 1        | 6.20E-07 | -0.0966  | 0.019377 |
| rs62037367 | 16 | 28874547 | C | G | 0.619866 | 0.986195 | 5.90E-07 | -0.09763 | 0.019547 |
| rs7198606  | 16 | 28875122 | T | G | 0.619861 | 0.986217 | 5.90E-07 | -0.09764 | 0.019546 |
| rs11864750 | 16 | 28875204 | A | T | 0.619861 | 0.986217 | 5.90E-07 | -0.09764 | 0.019546 |
| rs7193733  | 16 | 28875482 | A | G | 0.619861 | 0.986217 | 5.90E-07 | -0.09764 | 0.019546 |
| rs11863370 | 16 | 28879484 | A | G | 0.620023 | 0.985719 | 5.70E-07 | -0.09782 | 0.019556 |
| rs8055982  | 16 | 28881202 | A | C | 0.61985  | 0.986309 | 5.90E-07 | -0.09762 | 0.019546 |
| rs7498603  | 16 | 28882424 | T | C | 0.619846 | 0.986305 | 5.90E-07 | -0.09762 | 0.019546 |
| rs7498665  | 16 | 28883241 | A | G | 0.61985  | 0.986309 | 5.90E-07 | -0.09762 | 0.019546 |
| rs62037369 | 16 | 28883841 | C | T | 0.620658 | 0.986427 | 4.00E-07 | -0.09911 | 0.019555 |
| rs7359397  | 16 | 28885659 | C | T | 0.617368 | 0.999966 | 4.20E-07 | -0.09806 | 0.019384 |
| rs11864107 | 16 | 28885931 | T | C | 0.619877 | 0.986343 | 5.80E-07 | -0.09771 | 0.019548 |
| rs3888190  | 16 | 28889486 | C | A | 0.619852 | 0.98642  | 5.80E-07 | -0.09766 | 0.019546 |
| rs62037371 | 16 | 28890131 | C | A | 0.619852 | 0.986418 | 5.80E-07 | -0.09766 | 0.019546 |
| rs8055138  | 16 | 28891465 | C | T | 0.619853 | 0.986373 | 5.90E-07 | -0.09764 | 0.019547 |
| rs11641216 | 16 | 28893532 | A | G | 0.619858 | 0.986395 | 5.80E-07 | -0.09767 | 0.019547 |
| rs7498555  | 16 | 28893571 | T | C | 0.620714 | 0.986399 | 4.30E-07 | -0.09885 | 0.019549 |
| rs8061590  | 16 | 28895130 | A | G | 0.619783 | 0.986205 | 7.10E-07 | -0.09692 | 0.019548 |

SNP: Single Nucleotide Polymorphism; CHR: Chromosome; A1, Effect allele; A2, Other allele; FREQ: Effect allele frequency; Beta: coefficient from BOLT infinitesimal model; SE: standard error; P: tow-tailed p-value; INFO: Estimated imputation score.

**Supplementary Table 21** | G6 associated genome-wide significant SNP list.

| SNP        | CHR | BP       | A1 | A2 | FREQ     | INFO     | P        | BETA     | SE       |
|------------|-----|----------|----|----|----------|----------|----------|----------|----------|
| rs11705789 | 3   | 81969196 | G  | T  | 0.641119 | 0.988511 | 4.50E-08 | -0.11126 | 0.020347 |
| rs10779986 | 3   | 81970818 | C  | G  | 0.641444 | 0.987061 | 4.80E-08 | -0.11116 | 0.02036  |

SNP: Single Nucleotide Polymorphism; CHR: Chromosome; A1, Effect allele; A2, Other allele; FREQ: Effect allele frequency; Beta: coefficient from BOLT infinitesimal model; SE: standard error; P: two-tailed p-value; INFO: Estimated imputation score.

**Supplementary Table 22** | G6 associated SNPs at the suggestive threshold of significance ( $1 \times 10^{-6}$ ).

| SNP        | CHR | BP       | A1 | A2 | FREQ     | INFO     | P        | BETA     | SE       |
|------------|-----|----------|----|----|----------|----------|----------|----------|----------|
| rs7599739  | 2   | 27363152 | G  | T  | 0.650732 | 0.991775 | 5.60E-07 | 0.103456 | 0.020678 |
| rs28489942 | 2   | 27368588 | T  | C  | 0.649187 | 0.999279 | 5.50E-07 | 0.103034 | 0.020579 |
| rs62128740 | 2   | 27369421 | C  | T  | 0.650713 | 0.993176 | 5.40E-07 | 0.103589 | 0.020665 |
| rs1375087  | 3   | 81675652 | G  | C  | 0.445145 | 0.980831 | 8.20E-07 | -0.09738 | 0.019753 |
| rs9852545  | 3   | 81677459 | T  | G  | 0.445365 | 0.981274 | 8.60E-07 | -0.0972  | 0.019754 |
| rs1973805  | 3   | 81946539 | C  | A  | 0.627484 | 0.98604  | 1.20E-07 | -0.10705 | 0.020208 |
| rs9838747  | 3   | 81949639 | G  | C  | 0.433813 | 0.979746 | 2.20E-07 | -0.10311 | 0.01989  |
| rs13093082 | 3   | 81949958 | C  | T  | 0.656764 | 0.985314 | 7.50E-08 | -0.11055 | 0.020557 |
| rs10511101 | 3   | 81950302 | A  | C  | 0.656779 | 0.985315 | 7.60E-08 | -0.11053 | 0.020557 |
| rs9309881  | 3   | 81950904 | C  | T  | 0.469451 | 0.987349 | 4.80E-07 | -0.099   | 0.019663 |
| rs7621968  | 3   | 81951460 | A  | G  | 0.657004 | 0.987322 | 8.10E-08 | -0.11016 | 0.020532 |
| rs1818901  | 3   | 81953502 | G  | A  | 0.468973 | 0.98736  | 4.30E-07 | -0.09943 | 0.019661 |
| rs4479621  | 3   | 81954308 | T  | A  | 0.468966 | 0.987362 | 4.30E-07 | -0.09943 | 0.019661 |
| rs4273393  | 3   | 81954355 | G  | A  | 0.468855 | 0.987336 | 4.50E-07 | -0.0992  | 0.019661 |
| rs11925940 | 3   | 81954672 | G  | C  | 0.468965 | 0.987371 | 4.20E-07 | -0.09944 | 0.019661 |
| rs1851917  | 3   | 81955995 | C  | T  | 0.468973 | 0.987309 | 4.40E-07 | -0.09934 | 0.019662 |
| rs9854004  | 3   | 81958242 | C  | T  | 0.657375 | 0.989597 | 9.70E-08 | -0.10934 | 0.020509 |
| rs9820349  | 3   | 81958587 | A  | G  | 0.657291 | 0.989478 | 8.00E-08 | -0.11011 | 0.020512 |
| rs7653333  | 3   | 81960024 | C  | T  | 0.469116 | 0.98996  | 4.60E-07 | -0.09901 | 0.019632 |
| rs1973804  | 3   | 81962522 | C  | T  | 0.469977 | 0.989051 | 4.60E-07 | -0.09902 | 0.019636 |
| rs957670   | 3   | 81962838 | C  | T  | 0.467303 | 0.999495 | 4.20E-07 | -0.09888 | 0.019539 |
| rs1973803  | 3   | 81962978 | C  | T  | 0.4701   | 0.989104 | 4.40E-07 | -0.09921 | 0.019634 |
| rs6774438  | 3   | 81963379 | C  | T  | 0.470099 | 0.9891   | 4.40E-07 | -0.09921 | 0.019634 |
| rs9810377  | 3   | 81963864 | G  | A  | 0.498957 | 0.988112 | 2.20E-07 | -0.10183 | 0.019649 |
| rs4622918  | 3   | 81965382 | A  | G  | 0.657986 | 0.989629 | 7.50E-08 | -0.11038 | 0.020518 |
| rs4399914  | 3   | 81965477 | C  | T  | 0.624971 | 0.999625 | 5.60E-07 | -0.10008 | 0.020004 |
| rs4479620  | 3   | 81965494 | G  | C  | 0.628837 | 0.991233 | 2.80E-07 | -0.10359 | 0.020156 |
| rs4618242  | 3   | 81965535 | G  | C  | 0.628786 | 0.991185 | 2.70E-07 | -0.1037  | 0.020158 |
| rs2030708  | 3   | 81967436 | G  | A  | 0.453429 | 0.987562 | 1.60E-07 | -0.10364 | 0.019757 |
| rs1971426  | 3   | 81968285 | C  | T  | 0.453429 | 0.987562 | 1.60E-07 | -0.10364 | 0.019757 |
| rs6548779  | 3   | 81968512 | A  | G  | 0.612208 | 0.989894 | 1.60E-07 | -0.10492 | 0.020029 |
| rs1969433  | 3   | 81968869 | T  | C  | 0.61221  | 0.989889 | 1.60E-07 | -0.10492 | 0.020029 |
| rs11705789 | 3   | 81969196 | G  | T  | 0.641119 | 0.988511 | 4.50E-08 | -0.11126 | 0.020347 |
| rs10779986 | 3   | 81970818 | C  | G  | 0.641444 | 0.987061 | 4.80E-08 | -0.11116 | 0.02036  |
| rs10779987 | 3   | 81970856 | C  | T  | 0.612252 | 0.988451 | 1.80E-07 | -0.10465 | 0.020043 |
| rs6808112  | 3   | 81971675 | A  | G  | 0.453531 | 0.985821 | 1.50E-07 | -0.10383 | 0.019767 |
| rs6797240  | 3   | 81971856 | T  | C  | 0.612477 | 0.988516 | 1.70E-07 | -0.10473 | 0.020041 |

|            |   |          |   |   |          |          |          |          |          |
|------------|---|----------|---|---|----------|----------|----------|----------|----------|
| rs6797340  | 3 | 81971954 | T | G | 0.453483 | 0.985451 | 1.40E-07 | -0.10401 | 0.019773 |
| rs11127746 | 3 | 81974175 | C | T | 0.641079 | 0.987262 | 5.20E-08 | -0.11082 | 0.020361 |
| rs9877408  | 3 | 81974558 | A | G | 0.61241  | 0.988449 | 1.80E-07 | -0.10467 | 0.020043 |
| rs1851929  | 3 | 81975266 | T | A | 0.453584 | 0.985829 | 1.50E-07 | -0.10374 | 0.019765 |
| rs1851928  | 3 | 81975395 | C | T | 0.612884 | 0.987509 | 1.70E-07 | -0.10499 | 0.020057 |
| rs6548780  | 3 | 81975649 | C | T | 0.453702 | 0.985857 | 1.40E-07 | -0.10395 | 0.019764 |
| rs13068700 | 3 | 81975817 | G | C | 0.641452 | 0.987388 | 5.10E-08 | -0.1109  | 0.020358 |
| rs1851926  | 3 | 81977231 | A | C | 0.612431 | 0.988544 | 1.80E-07 | -0.10468 | 0.020042 |
| rs1851925  | 3 | 81978614 | A | C | 0.453668 | 0.985905 | 1.40E-07 | -0.10401 | 0.019765 |
| rs9870954  | 3 | 81978850 | A | G | 0.612516 | 0.988218 | 1.80E-07 | -0.10464 | 0.020047 |
| rs1851923  | 3 | 81979057 | G | A | 0.45362  | 0.985888 | 1.40E-07 | -0.10398 | 0.019764 |
| rs1851919  | 3 | 81980402 | C | T | 0.448709 | 0.985301 | 3.60E-07 | -0.10088 | 0.01982  |
| rs1851918  | 3 | 81980557 | G | A | 0.613733 | 0.987185 | 4.00E-07 | -0.10187 | 0.020093 |
| rs35779564 | 3 | 81982771 | G | A | 0.630698 | 0.987019 | 1.60E-07 | -0.10605 | 0.020248 |
| rs9817070  | 3 | 81982936 | A | G | 0.612413 | 0.988052 | 3.90E-07 | -0.1018  | 0.020054 |
| rs9859613  | 3 | 81983550 | C | T | 0.448943 | 0.985253 | 3.80E-07 | -0.10065 | 0.019817 |
| rs9309882  | 3 | 81984281 | G | A | 0.448596 | 0.986235 | 4.20E-07 | -0.10022 | 0.019812 |
| rs7430321  | 3 | 81984643 | A | C | 0.448587 | 0.986247 | 4.20E-07 | -0.10023 | 0.019812 |
| rs9865552  | 3 | 81984976 | C | T | 0.448594 | 0.986268 | 4.20E-07 | -0.10021 | 0.019812 |
| rs6778265  | 3 | 81985745 | T | C | 0.612149 | 0.988388 | 6.90E-07 | -0.09952 | 0.020044 |
| rs6766011  | 3 | 81986136 | G | A | 0.612162 | 0.988338 | 6.90E-07 | -0.09953 | 0.020045 |
| rs7640558  | 3 | 81987410 | A | G | 0.447161 | 0.986022 | 3.30E-07 | -0.10118 | 0.019826 |
| rs12636122 | 3 | 81989008 | G | A | 0.447155 | 0.986008 | 3.30E-07 | -0.10116 | 0.019825 |
| rs6770740  | 3 | 81989081 | T | C | 0.446544 | 0.984537 | 4.10E-07 | -0.1005  | 0.019842 |
| rs6780807  | 3 | 81991806 | T | G | 0.44693  | 0.986102 | 3.00E-07 | -0.10148 | 0.019816 |
| rs4324483  | 3 | 81992049 | C | T | 0.446933 | 0.98611  | 3.00E-07 | -0.10148 | 0.019816 |
| rs4437168  | 3 | 81993039 | T | C | 0.446006 | 0.986058 | 2.20E-07 | -0.10261 | 0.019812 |
| rs4488862  | 3 | 81995377 | A | G | 0.446936 | 0.986108 | 3.00E-07 | -0.10149 | 0.019816 |
| rs4296616  | 3 | 81995482 | C | T | 0.446934 | 0.986114 | 3.00E-07 | -0.10148 | 0.019816 |
| rs9830303  | 3 | 81996166 | A | G | 0.446023 | 0.985985 | 2.20E-07 | -0.10272 | 0.019813 |
| rs4557185  | 3 | 81996236 | G | A | 0.44693  | 0.9861   | 3.00E-07 | -0.10151 | 0.019816 |
| rs4482683  | 3 | 81996949 | A | C | 0.446935 | 0.986117 | 3.00E-07 | -0.10148 | 0.019816 |
| rs6548786  | 3 | 81997510 | C | T | 0.4468   | 0.987081 | 3.00E-07 | -0.10151 | 0.019809 |
| rs6548787  | 3 | 81997877 | C | T | 0.4468   | 0.98708  | 3.00E-07 | -0.10151 | 0.019809 |
| rs7620422  | 3 | 81999023 | C | T | 0.446797 | 0.987074 | 3.00E-07 | -0.10151 | 0.019809 |
| rs12629007 | 3 | 81999266 | C | T | 0.44831  | 0.987047 | 3.40E-07 | -0.10092 | 0.0198   |
| rs4435664  | 3 | 81999689 | C | T | 0.448457 | 0.987061 | 4.10E-07 | -0.10023 | 0.019797 |
| rs4261900  | 3 | 81999927 | A | T | 0.446798 | 0.987068 | 3.00E-07 | -0.1015  | 0.019809 |
| rs12632474 | 3 | 82000232 | T | C | 0.446798 | 0.987067 | 3.00E-07 | -0.1015  | 0.019809 |

|            |    |          |   |   |          |          |          |          |          |
|------------|----|----------|---|---|----------|----------|----------|----------|----------|
| rs13069237 | 3  | 82000423 | C | T | 0.446799 | 0.987077 | 3.00E-07 | -0.1015  | 0.019809 |
| rs7626596  | 3  | 82000680 | G | A | 0.446973 | 0.987416 | 3.10E-07 | -0.10129 | 0.019798 |
| rs4462992  | 3  | 82003569 | T | C | 0.445717 | 0.987379 | 2.50E-07 | -0.10216 | 0.0198   |
| rs4572795  | 3  | 82004356 | G | A | 0.446591 | 0.987416 | 3.40E-07 | -0.10102 | 0.019807 |
| rs6548788  | 3  | 82005088 | T | C | 0.445564 | 0.98606  | 2.80E-07 | -0.10175 | 0.019816 |
| rs4465962  | 3  | 82005704 | C | T | 0.448204 | 0.985959 | 4.90E-07 | -0.09968 | 0.019811 |
| rs4465963  | 3  | 82005780 | C | T | 0.448152 | 0.985868 | 5.20E-07 | -0.09941 | 0.019812 |
| rs9816321  | 3  | 82006853 | T | C | 0.445567 | 0.986063 | 2.80E-07 | -0.10175 | 0.019816 |
| rs4314192  | 3  | 82007411 | A | G | 0.445563 | 0.986062 | 2.80E-07 | -0.10175 | 0.019816 |
| rs4465966  | 3  | 82009703 | A | G | 0.445486 | 0.985996 | 2.90E-07 | -0.10171 | 0.019817 |
| rs9309883  | 3  | 82014428 | C | A | 0.445596 | 0.986199 | 2.90E-07 | -0.1018  | 0.019837 |
| rs7427000  | 3  | 82015818 | G | T | 0.445295 | 0.986098 | 2.60E-07 | -0.10215 | 0.019838 |
| rs9840924  | 3  | 82016600 | T | C | 0.445492 | 0.986264 | 3.00E-07 | -0.10162 | 0.019837 |
| rs9275613  | 6  | 32684105 | C | T | 0.889008 | 0.997205 | 9.10E-07 | -0.15371 | 0.031299 |
| rs9275614  | 6  | 32684257 | A | G | 0.888754 | 1        | 8.40E-07 | -0.15385 | 0.031225 |
| rs9275615  | 6  | 32684272 | T | A | 0.889008 | 0.997462 | 8.80E-07 | -0.15387 | 0.031297 |
| rs9275618  | 6  | 32684387 | A | G | 0.889    | 0.997129 | 8.50E-07 | -0.1541  | 0.031302 |
| rs3916765  | 6  | 32685550 | G | A | 0.889014 | 0.999555 | 5.60E-07 | -0.15669 | 0.031302 |
| rs9276627  | 6  | 32743835 | C | T | 0.918312 | 0.987555 | 3.80E-07 | -0.18139 | 0.035725 |
| rs3763355  | 6  | 32786882 | T | C | 0.936491 | 0.999829 | 8.40E-08 | -0.21428 | 0.039994 |
| rs4148876  | 6  | 32796793 | G | A | 0.930502 | 0.987123 | 4.70E-07 | -0.19454 | 0.038599 |
| rs8092641  | 18 | 74253251 | C | T | 0.421523 | 0.951494 | 1.50E-07 | -0.10666 | 0.020313 |

SNP: Single Nucleotide Polymorphism; CHR: Chromosome; A1, Effect allele; A2, Other allele; FREQ: Effect allele frequency; Beta: coefficient from BOLT infinitesimal model; SE: standard error; P: two-tailed p-value; INFO: Estimated imputation score.

**Supplementary Table 23** | Replication of G4 and G6 associated independent SNPs in previously published genome-wide association meta-analysis of human intelligence or general cognitive ability.

| PMID                  | CHR:BP      | A1 | A2 | FREQ  | BETA    | SE     | P         | INFO  |
|-----------------------|-------------|----|----|-------|---------|--------|-----------|-------|
| <b>G4: rs62034351</b> |             |    |    |       |         |        |           |       |
| 29942086              | 16:28565489 | G  | A  | 0.648 | -0.0258 | 0.0029 | 2.935E-19 | 0.90  |
| 28530673              | 16:28565489 | G  | A  | 0.626 | -0.0244 | 0.0063 | 0.0001    | >0.60 |
| <b>G6: rs11705789</b> |             |    |    |       |         |        |           |       |
| 29942086              | 3:81969196  | G  | T  | 0.634 | -0.0024 | 0.0028 | 0.40      | 0.90  |
| 28530673              | 3:81969196  | G  | T  | 0.626 | -0.0073 | 0.0052 | 0.16      | >0.60 |

Study specific findings were reported with unique identifier number used in PubMed (PMID), genomic coordinates (CHR:BP; GRCh37.p13/ Hg19/); A1: effect allele; A2: other allele; FREQ: effect allele frequency; Beta: coefficient from BOLT infinitesimal model; SE: standard error; P: two-tailed p-value; INFO, estimated imputation score. We harmonised summary statistics for both SNPs manually. We harmonised summary statistics for both SNPs manually. The direction of beta values was reversed as scores for the measure of general cognitive ability or intelligence were calculated using cognitive test scores where higher scores indicated better performances.

**Supplementary Table 24** | List of candidate SNP IDs for G4 annotated to have an exonic function.

| SNP ID          | Gene            | Annotation | Exonic Function   | Exon  | Symbol  | Chromosome | Position |
|-----------------|-----------------|------------|-------------------|-------|---------|------------|----------|
| 16:28354353:G:T | ENSG00000198156 | exonic     | nonsynonymous SNV | exon7 | NPIP6   | 16         | 28354353 |
| 16:28506872:A:G | ENSG00000184730 | exonic     | synonymous SNV    | exon2 | APOBR   | 16         | 28506872 |
| 16:28507644:C:G | ENSG00000184730 | exonic     | nonsynonymous SNV | exon2 | APOBR   | 16         | 28507644 |
| 16:28508048:A:G | ENSG00000184730 | exonic     | synonymous SNV    | exon2 | APOBR   | 16         | 28508048 |
| 16:28508069:C:T | ENSG00000184730 | exonic     | synonymous SNV    | exon2 | APOBR   | 16         | 28508069 |
| 16:28508447:A:G | ENSG00000184730 | exonic     | synonymous SNV    | exon2 | APOBR   | 16         | 28508447 |
| 16:28513403:A:G | ENSG00000197272 | exonic     | nonsynonymous SNV | exon4 | IL27    | 16         | 28513403 |
| 16:28603655:G:T | ENSG00000197165 | exonic     | nonsynonymous SNV | exon3 | SULT1A2 | 16         | 28603655 |
| 16:28607228:A:G | ENSG00000197165 | exonic     | synonymous SNV    | exon1 | SULT1A2 | 16         | 28607228 |
| 16:28607232:A:G | ENSG00000197165 | exonic     | nonsynonymous SNV | exon1 | SULT1A2 | 16         | 28607232 |
| 16:28619911:C:T | ENSG00000196502 | exonic     | synonymous SNV    | exon3 | SULT1A1 | 16         | 28619911 |
| 16:28619920:A:G | ENSG00000196502 | exonic     | synonymous SNV    | exon3 | SULT1A1 | 16         | 28619920 |
| 16:28649787:A:G | ENSG00000255524 | exonic     | nonsynonymous SNV | exon1 | NPIP8   | 16         | 28649787 |
| 16:28883241:A:G | ENSG00000178188 | exonic     | nonsynonymous SNV | exon5 | SH2B1   | 16         | 28883241 |



**Supplementary Table 25** | Genes prioritised by genome-wide gene-based association analysis, positional, eqtl and chromatin interaction mapping.

| SYMBOL       | Genes           | MAGMA           | Pos Mapped      | Eqtl Mapped     | Ci Mapped       |
|--------------|-----------------|-----------------|-----------------|-----------------|-----------------|
| AC009133.15  | ENSG00000259952 |                 |                 |                 | ENSG00000259952 |
| ALDOA        | ENSG00000149925 |                 |                 |                 | ENSG00000149925 |
| APOBR        | ENSG00000184730 | ENSG00000184730 | ENSG00000184730 | ENSG00000184730 |                 |
| APOL3        | ENSG00000128284 |                 |                 | ENSG00000128284 |                 |
| ASCL2        | ENSG00000183734 |                 |                 | ENSG00000183734 |                 |
| ASPHD1       | ENSG00000174939 |                 |                 |                 | ENSG00000174939 |
| ATP2A1       | ENSG00000196296 |                 | ENSG00000196296 | ENSG00000196296 | ENSG00000196296 |
| ATXN2L       | ENSG00000168488 | ENSG00000168488 | ENSG00000168488 | ENSG00000168488 | ENSG00000168488 |
| BIVM         | ENSG00000134897 |                 |                 | ENSG00000134897 |                 |
| BTN3A3       | ENSG00000111801 |                 |                 | ENSG00000111801 |                 |
| C14orf132    | ENSG00000227051 |                 |                 | ENSG00000227051 |                 |
| C16orf93     | ENSG00000196118 |                 |                 |                 | ENSG00000196118 |
| C1QB         | ENSG00000173369 |                 |                 | ENSG00000173369 |                 |
| C1orf61      | ENSG00000125462 |                 |                 | ENSG00000125462 |                 |
| CCDC101      | ENSG00000176476 | ENSG00000176476 | ENSG00000176476 | ENSG00000176476 | ENSG00000176476 |
| CD19         | ENSG00000177455 |                 | ENSG00000177455 |                 | ENSG00000177455 |
| CD38         | ENSG00000004468 |                 |                 | ENSG00000004468 |                 |
| CDC37P1      | ENSG00000259982 |                 | ENSG00000259982 | ENSG00000259982 |                 |
| CDIPT        | ENSG00000103502 |                 |                 |                 | ENSG00000103502 |
| CDIPT-AS1    | ENSG00000214725 |                 |                 |                 | ENSG00000214725 |
| CLN3         | ENSG00000188603 | ENSG00000188603 | ENSG00000188603 | ENSG00000188603 |                 |
| COCH         | ENSG00000100473 |                 |                 | ENSG00000100473 |                 |
| CTB-134H23.3 | ENSG00000260908 |                 |                 | ENSG00000260908 |                 |
| DAAM1        | ENSG00000100592 |                 |                 | ENSG00000100592 |                 |
| DDB2         | ENSG00000134574 |                 |                 | ENSG00000134574 |                 |
| DYNLT1       | ENSG00000146425 |                 |                 | ENSG00000146425 |                 |
| EIF3C        | ENSG00000184110 | ENSG00000184110 | ENSG00000184110 | ENSG00000184110 |                 |
| EIF3CL       | ENSG00000205609 | ENSG00000205609 | ENSG00000205609 | ENSG00000205609 |                 |
| FAM26F       | ENSG00000188820 |                 |                 | ENSG00000188820 |                 |
| FAM57B       | ENSG00000149926 |                 |                 |                 | ENSG00000149926 |

|           |                 |                 |                 |                 |                 |
|-----------|-----------------|-----------------|-----------------|-----------------|-----------------|
| GBP1      | ENSG00000117228 |                 |                 | ENSG00000117228 |                 |
| GBP1P1    | ENSG00000225492 |                 |                 | ENSG00000225492 |                 |
| GBP2      | ENSG00000162645 |                 |                 | ENSG00000162645 |                 |
| GCH1      | ENSG00000131979 |                 |                 | ENSG00000131979 |                 |
| GPBAR1    | ENSG00000179921 |                 |                 | ENSG00000179921 |                 |
| GSDMD     | ENSG00000104518 |                 |                 | ENSG00000104518 |                 |
| HAPLN3    | ENSG00000140511 |                 |                 | ENSG00000140511 |                 |
| HIRIP3    | ENSG00000149929 |                 |                 |                 | ENSG00000149929 |
| HKDC1     | ENSG00000156510 |                 |                 | ENSG00000156510 |                 |
| IL15      | ENSG00000164136 |                 |                 | ENSG00000164136 |                 |
| IL15RA    | ENSG00000134470 |                 |                 | ENSG00000134470 |                 |
| IL27      | ENSG00000197272 | ENSG00000197272 | ENSG00000197272 | ENSG00000197272 |                 |
| INO80E    | ENSG00000169592 |                 |                 |                 | ENSG00000169592 |
| JAK2      | ENSG00000096968 |                 |                 | ENSG00000096968 |                 |
| KIF22     | ENSG00000079616 |                 |                 |                 | ENSG00000079616 |
| LAP3      | ENSG00000002549 |                 |                 | ENSG00000002549 |                 |
| LAT       | ENSG00000213658 |                 |                 | ENSG00000213658 | ENSG00000213658 |
| LGALS3BP  | ENSG00000108679 |                 |                 | ENSG00000108679 |                 |
| LINC00324 | ENSG00000178977 |                 |                 | ENSG00000178977 |                 |
| MAF       | ENSG00000178573 |                 |                 | ENSG00000178573 |                 |
| MAZ       | ENSG00000103495 |                 |                 |                 | ENSG00000103495 |
| MIR4721   | ENSG00000264455 |                 | ENSG00000264455 | ENSG00000264455 |                 |
| MOV10     | ENSG00000155363 |                 |                 | ENSG00000155363 |                 |
| MT2A      | ENSG00000125148 |                 |                 | ENSG00000125148 |                 |
| MUC1      | ENSG00000185499 |                 |                 | ENSG00000185499 |                 |
| MYLPF     | ENSG00000180209 |                 |                 |                 | ENSG00000180209 |
| MYOF      | ENSG00000138119 |                 |                 | ENSG00000138119 |                 |
| N4BP2L1   | ENSG00000139597 |                 |                 | ENSG00000139597 |                 |
| NFATC2IP  | ENSG00000176953 |                 | ENSG00000176953 | ENSG00000176953 | ENSG00000176953 |
| NLRC5     | ENSG00000140853 |                 |                 | ENSG00000140853 |                 |
| NPIP6     | ENSG00000198156 | ENSG00000198156 | ENSG00000198156 | ENSG00000198156 |                 |
| NPIP7     | ENSG00000233232 | ENSG00000233232 | ENSG00000233232 | ENSG00000233232 |                 |
| NPIP8     | ENSG00000255524 | ENSG00000255524 | ENSG00000255524 | ENSG00000255524 |                 |
| NPIP9     | ENSG00000196993 | ENSG00000196993 | ENSG00000196993 | ENSG00000196993 |                 |
| NUPR1     | ENSG00000176046 | ENSG00000176046 | ENSG00000176046 | ENSG00000176046 | ENSG00000176046 |

|                |                 |                 |                 |                 |
|----------------|-----------------|-----------------|-----------------|-----------------|
| ORC3           | ENSG00000135336 |                 | ENSG00000135336 |                 |
| PARP3          | ENSG00000041880 |                 | ENSG00000041880 |                 |
| PATL2          | ENSG00000229474 |                 | ENSG00000229474 |                 |
| PBX3           | ENSG00000167081 |                 | ENSG00000167081 |                 |
| PHKG2          | ENSG00000156873 |                 |                 | ENSG00000156873 |
| PSMB10         | ENSG00000205220 |                 | ENSG00000205220 |                 |
| PSME1          | ENSG00000092010 |                 | ENSG00000092010 |                 |
| PSME2          | ENSG00000100911 |                 | ENSG00000100911 |                 |
| RABEP2         | ENSG00000177548 | ENSG00000177548 | ENSG00000177548 | ENSG00000177548 |
| RARRES3        | ENSG00000133321 |                 | ENSG00000133321 |                 |
| RGS1           | ENSG00000090104 |                 | ENSG00000090104 |                 |
| RNF31          | ENSG00000092098 |                 | ENSG00000092098 |                 |
| RNF40          | ENSG00000103549 |                 |                 | ENSG00000103549 |
| RP11-1348G14.1 | ENSG00000240634 | ENSG00000240634 |                 |                 |
| RP11-1348G14.4 | ENSG00000251417 | ENSG00000251417 | ENSG00000251417 |                 |
| RP11-1348G14.5 | ENSG00000260796 | ENSG00000260796 | ENSG00000260796 | ENSG00000260796 |
| RP11-1348G14.6 | ENSG00000270424 | ENSG00000270424 | ENSG00000270424 |                 |
| RP11-22P6.2    | ENSG00000261766 | ENSG00000261766 | ENSG00000261766 | ENSG00000261766 |
| RP11-22P6.3    | ENSG00000260442 | ENSG00000260442 | ENSG00000260442 | ENSG00000260442 |
| RP11-231C14.4  | ENSG00000169203 |                 | ENSG00000169203 |                 |
| RP11-24N18.1   | ENSG00000260570 | ENSG00000260570 | ENSG00000260570 |                 |
| RP11-264B17.2  | ENSG00000260853 |                 | ENSG00000260853 |                 |
| RP11-264B17.3  | ENSG00000261067 |                 | ENSG00000261067 | ENSG00000261067 |
| RP11-264B17.4  | ENSG00000260367 |                 | ENSG00000260367 | ENSG00000260367 |
| RP11-426C22.5  | ENSG00000260517 |                 | ENSG00000260517 |                 |
| RP11-435I10.3  | ENSG00000261089 | ENSG00000261089 | ENSG00000261089 |                 |
| RP11-435I10.5  | ENSG00000271623 | ENSG00000271623 | ENSG00000271623 |                 |
| RP11-57A19.2   | ENSG00000246465 |                 | ENSG00000246465 | ENSG00000246465 |
| RP11-57A19.4   | ENSG00000261419 | ENSG00000261419 |                 |                 |
| RP11-666O2.1   | ENSG00000271495 | ENSG00000271495 |                 |                 |
| RP11-693N9.2   | ENSG00000235505 |                 | ENSG00000235505 |                 |
| RPS6KA5        | ENSG00000100784 |                 | ENSG00000100784 |                 |
| RRN3P2         | ENSG00000103472 |                 | ENSG00000103472 |                 |
| SBK1           | ENSG00000188322 | ENSG00000188322 | ENSG00000188322 | ENSG00000188322 |
| SDSL           | ENSG00000139410 |                 | ENSG00000139410 |                 |

|          |                 |                 |                 |                 |                 |
|----------|-----------------|-----------------|-----------------|-----------------|-----------------|
| SEPHS2   | ENSG00000179918 |                 |                 |                 | ENSG00000179918 |
| SEPTIN1  | ENSG00000180096 |                 |                 |                 | ENSG00000180096 |
| SEZ6L2   | ENSG00000174938 |                 |                 |                 | ENSG00000174938 |
| SH2B1    | ENSG00000178188 | ENSG00000178188 | ENSG00000178188 | ENSG00000178188 |                 |
| SMCO4    | ENSG00000166002 |                 |                 | ENSG00000166002 |                 |
| SNORA43  | ENSG00000252461 |                 | ENSG00000252461 |                 | ENSG00000252461 |
| SNX10    | ENSG00000086300 |                 |                 | ENSG00000086300 |                 |
| SPNS1    | ENSG00000169682 |                 |                 | ENSG00000169682 | ENSG00000169682 |
| STAT1    | ENSG00000115415 |                 |                 | ENSG00000115415 |                 |
| STAT5A   | ENSG00000126561 |                 |                 | ENSG00000126561 |                 |
| SULT1A1  | ENSG00000196502 | ENSG00000196502 | ENSG00000196502 | ENSG00000196502 | ENSG00000196502 |
| SULT1A2  | ENSG00000197165 | ENSG00000197165 | ENSG00000197165 | ENSG00000197165 |                 |
| SULT1A4  | ENSG00000213648 |                 |                 | ENSG00000213648 |                 |
| SYNE2    | ENSG00000054654 |                 |                 | ENSG00000054654 |                 |
| TAOK2    | ENSG00000149930 |                 |                 |                 | ENSG00000149930 |
| TBC1D10B | ENSG00000169221 |                 |                 |                 | ENSG00000169221 |
| TTC32    | ENSG00000183891 |                 |                 | ENSG00000183891 |                 |
| TUFM     | ENSG00000178952 | ENSG00000178952 | ENSG00000178952 | ENSG00000178952 |                 |
| UBE2L6   | ENSG00000156587 |                 |                 | ENSG00000156587 |                 |
| VAMP5    | ENSG00000168899 |                 |                 | ENSG00000168899 |                 |
| VCPIP1   | ENSG00000175073 |                 |                 | ENSG00000175073 |                 |
| WARS     | ENSG00000140105 |                 |                 | ENSG00000140105 |                 |
| WNT7A    | ENSG00000154764 |                 |                 | ENSG00000154764 |                 |
| XPO6     | ENSG00000169180 |                 |                 | ENSG00000169180 | ENSG00000169180 |
| ZNF629   | ENSG00000102870 |                 |                 |                 | ENSG00000102870 |
| ZNF771   | ENSG00000179965 |                 |                 |                 | ENSG00000179965 |
| ZNF800   | ENSG00000048405 |                 |                 | ENSG00000048405 |                 |
| snoU13   | ENSG00000238684 |                 | ENSG00000238684 |                 |                 |

Pos\_mapping column presents genes prioritised by positional mapping strategy.

Eqtl\_mapping column presents genes prioritised by eQTL mapping strategy.

Ci\_mapping column presents genes prioritised by chromatin interaction mapping strategy.

**Supplementary Table 26** | Top 10 clusters with their representative enriched terms for G4. "Log10(P)" is the p-value (computed using the cumulative hypergeometric distribution) in log base 10. "Log10(q)" is the multi-test adjusted p-value in log base 10.

| Category     | Term          | Description                                                                            | LogP     | Log (q-value) | Symbols                                                                                                                                                                                                                                                                                                                                                               |
|--------------|---------------|----------------------------------------------------------------------------------------|----------|---------------|-----------------------------------------------------------------------------------------------------------------------------------------------------------------------------------------------------------------------------------------------------------------------------------------------------------------------------------------------------------------------|
| Immunologic  | M3408         | GSE1432 CTRL VS IFNG 24H MICROGLIA DN                                                  | -29.7606 | -25.1823      | ASCL2,CD38,GBP1,GBP2,GCH1,IL15,IL15RA,JAK2, LGALS3BP,PSMB10,PSME1,PSME2,PLAAT4,STAT1, DYNLT1,WARS1,UBE2L6,BTN3A3,VAMP5,MYOF, SNX10,LAP3,SMCO4,APOL3,KIF22,STAT5A,RNF31, GSDMD,C1QB,DDB2,MUC1,N4BP2L1,PHKG2, SEPHS2,XPO6,MT2A,NLRC5,PARP3,SYNE2,RPS6KA5, GPBAR1,CDIPT,HAPLN3,PATL2,CALHM6,NUPR1, LINC00324,MOV10,APOBR,RGS1,SEZ6L2,SBK1, ORC3,MAF,SNORA17B,GBP1P1,SDSL |
| WikiPathways | WP4950        | 16p11.2 distal deletion syndrome                                                       | -19.0769 | -15.3438      | ATP2A1,CD19,JAK2,TUFM,ATXN2L,SH2B1,LAT, RABEP2,SPNS1,NFATC2IP,MIR4721                                                                                                                                                                                                                                                                                                 |
| Immunologic  | M9306         | GSE40685 TREG VS FOXP3 KO TREG PRECURSOR UP                                            | -18.4715 | -14.8972      | ASCL2,GBP2,GCH1,JAK2,MOV10,PSME1,PSME2, PLAAT4,STAT1,UBE2L6,BTN3A3,VAMP5,SNX10, SMCO4,NLRC5,HAPLN3,CALHM6                                                                                                                                                                                                                                                             |
| Immunologic  | M9308         | GSE40685 TREG VS FOXP3 KO TREG PRECURSOR DN                                            | -14.0704 | -10.8933      | C1QB,CD38,GCH1,IL15,JAK2,LGALS3BP,PSME1, PLAAT4,STAT1,SNX10,LAP3,APOL3,NLRC5, HAPLN3,IL15RA,MOV10,MT2A,PSME2,DYNLT1, UBE2L6,GBP1,GBP2,BTN3A3,CALHM6,PATL2                                                                                                                                                                                                             |
| Immunologic  | M7320         | GSE19888 ADENOSINE A3R INH PRETREAT AND ACT BY A3R VS TCELL MEMBRANES ACT MAST CELL UP | -14.0401 | -10.8933      | GBP2,GCH1,IL15,PSMB10,PSME1,PSME2,STAT1, WARS1,UBE2L6,PARP3,SNX10,RNF31,GSDMD, CALHM6,IL15RA,LGALS3BP,MOV10,NUPR1, NLRC5,LAP3,C1QB,JAK2,CD38,RGS1,BTN3A3, MT2A,SYNE2,MYOF,GBP1,ALDOA,APOL3, N4BP2L1,XPO6,COCH,STAT5A,MUC1,LAT,INO80E                                                                                                                                  |
| WikiPathways | WP4949        | 16p11.2 proximal deletion syndrome                                                     | -12.9307 | -9.84381      | ALDOA,KIF22,MAZ,HIRIP3,TAOK2,CDIPT, SEZ6L2,TLCD3B,ASPHD1,INO80E,PHKG2, UBE2L6,SEPHS2                                                                                                                                                                                                                                                                                  |
| Immunologic  | M9797         | GSE42724 NAIVE BCELL VS PLASMABLAST UP                                                 | -12.7313 | -9.65822      | CD38,GBP1,GCH1,IL15RA,LGALS3BP,MOV10, PSME1,PLAAT4,STAT1,UBE2L6,XPO6,LAP3, NLRC5,DYNLT1,WARS1,IL15,N4BP2L1, RPS6KA5,SBK1,MT2A,VAMP5,SEZ6L2, BTN3A3,PSME2,C1QB                                                                                                                                                                                                         |
| Immunologic  | M7543         | GSE21546 WT VS SAP1A KO DP THYMOCYTES UP                                               | -11.3962 | -8.37428      | GBP1,LGALS3BP,MOV10,MT2A,PSME1,PSME2, STAT1,UBE2L6,BTN3A3,VAMP5,LAP3,NLRC5, TTC32,PATL2,MYOF,EIF3C,SH2B1,DAAM1, SEZ6L2,SEPHS2                                                                                                                                                                                                                                         |
| Reactome     | R-HSA-1280215 | Cytokine Signaling in Immune system                                                    | -10.2207 | -7.2957       | GBP1,GBP2,IL15,IL15RA,JAK2,MT2A,MUC1, PSMB10,PSME1,PSME2,STAT1,STAT5A, UBE2L6,RPS6KA5,SH2B1,GSDMD,NLRC5, IL27,PLAAT4,LAP3,ZNF800,LAT,SBK1,DAAM1,                                                                                                                                                                                                                      |

|             |       |                                                        |          |          |                                                                                                                                                                                                                                            |
|-------------|-------|--------------------------------------------------------|----------|----------|--------------------------------------------------------------------------------------------------------------------------------------------------------------------------------------------------------------------------------------------|
| Immunologic | M6843 | GSE7548 DAY7 VS DAY28 PCC<br>IMMUNIZATION CD4 TCELL DN | -10.0034 | -7.14947 | SNX10,VCPIP1,MAF,RGS1,DDB2,WNT7A,<br>RNF31,NUPR1,LGALS3BP<br>ASCL2,DDB2,LGALS3BP,PSMB10,PSME1,<br>PSME2,PLAAT4,WARS1,RPS6KA5,BTN3A3,<br>VAMP5,GBP2,PHKG2,C1QB,CD38,STAT1,<br>STAT5A,XPO6,N4BP2L1,COCH,MT2A,DYNLT1,<br>MYOF,SMCO4,IL15,BIVM |
|-------------|-------|--------------------------------------------------------|----------|----------|--------------------------------------------------------------------------------------------------------------------------------------------------------------------------------------------------------------------------------------------|

**Supplementary Table 27** | Estimated genetic correlation for G4 and G6 with adulthood IQ, childhood IQ, educational attainment, and Alzheimer's Disease.

| Phenotypes             | PMID <sup>a</sup> | G4                                  |          |                                     | G6       |  |
|------------------------|-------------------|-------------------------------------|----------|-------------------------------------|----------|--|
|                        |                   | r <sub>g</sub> (se) <sup>a, *</sup> | P        | r <sub>g</sub> (se) <sup>a, *</sup> | P        |  |
| Adulthood IQ           | 29942086          | 0.88 (0.07)                         | 1.27e-37 | 0.74 (0.14)                         | 2.13e-07 |  |
| Adulthood IQ           | 28530673          | 0.88 (0.11)                         | 3.76e-15 | 0.75 (0.22)                         | 0.0006   |  |
| Childhood IQ           | 23358156          | 0.84 (0.14)                         | 2.35e-09 | 0.68 (0.24)                         | 0.0046   |  |
| Educational Attainment | 30038396          | 0.71 (0.06)                         | 1.9e-37  | 0.29 (0.07)                         | 9.4e-05  |  |
| Alzheimer's Disease    | 24162737          | 0.48 (0.15)                         | 0.001    | 0.37 (0.23)                         | 0.10     |  |

<sup>a</sup>PMID: PubMed Identifier; r<sub>g</sub>: estimate of genetic correlation; se: Standard Error; P: two-tailed p-value.

\*Positive correlations indicate worse performance of trait is positively associated with worse performance on G4 and G6.

**Supplementary Table 28** | Stimuli for the vocabulary test.

|              |              |                |            |                 |
|--------------|--------------|----------------|------------|-----------------|
| 1. Quarrel   | 2. Adhere    | 3. Handle      | 4. Sieve   | 5. Meander      |
| 6. Obsolete  | 7. Revoked   | 8. Ambiguous   | 9. Assail  | 10. Obsequious  |
| 11. Puerile  | 12. Paroxysm | 13. Ubiquitous | 14. Pinion | 15. Audaciously |
| 16. Putative | 17. Kaolin   | 18. Apocryphal | 19. Arcane | 20. Epigone     |

## Reference

95. Machiela, M.J. & Chanock, S.J. LDlink: a web-based application for exploring population-specific haplotype structure and linking correlated alleles of possible functional variants. *Bioinformatics* **31**, 3555-3557 (2015).
